# Supplementary material for: Identification of hub genes associated with acute kidney injury induced by renal ischemia–reperfusion injury in mice
Source: Front Physiol. 2022 Sep 29;13:951855. doi: 10.3389/fphys.2022.951855 (PMC9557154; doi:10.3389/fphys.2022.951855)
Supplement: Supplementary file 1 [file Table1.xls]

## Sheet: Table S1
	GSM971526	GSM971527	GSM971528	GSM971529	GSM971530	GSM971531	GSM971532	GSM971533
Fosl1	3.18538	2.74091	3.42057	2.8871	9.28669	9.55198	9.55117	10.522
Maff	5.21874	4.95801	5.83014	5.34428	10.7667	12.0876	11.1342	11.7809
Inhbb	5.21742	5.22076	5.21353	4.9124	9.82275	9.39373	9.25845	9.59131
Chac1	5.87552	4.90388	5.0781	5.85652	10.2987	11.2299	10.8204	11.2836
Tubb6	7.37183	7.48663	7.48306	8.00312	11.3138	11.2856	11.2059	11.5514
Ccl2	4.76815	4.58788	4.2576	5.34417	10.2861	9.35863	9.08255	10.0389
Akap12	8.74019	8.10353	8.45952	8.85785	12.5462	12.3237	12.1379	12.9498
Cdkn1a	4.89953	6.30809	5.24862	6.3535	10.8681	10.9481	10.5948	11.6883
Eps8l3	6.49183	5.67768	5.91222	6.00664	9.93433	9.92935	9.38656	9.57529
Hmox1	8.68063	9.33428	8.73967	8.96777	13.3869	13.2005	13.4795	14.8029
Sphk1	9.2609	7.65808	8.42892	8.40468	12.9728	13.2869	12.5446	12.797
Cebpb	7.42973	7.31082	8.04283	7.35541	10.9051	11.0645	10.7534	11.3057
Pdk4	9.42049	9.46645	8.16653	8.81569	13.1737	12.9169	12.9514	13.3104
Epha2	6.67036	6.11133	6.82982	6.80111	10.2132	11.4312	10.5498	11.5374
Tnfrsf12a	7.8075	8.11872	7.51276	7.71599	12.0426	12.1536	12.0058	13.6677
Map3k6	7.08936	6.10059	7.22284	6.29196	10.6285	10.8646	10.1936	10.3209
Mt1	11.0617	10.4821	10.7431	10.3257	13.777	14.2868	13.646	14.3704
Trib3	5.53208	4.51524	4.69907	5.58146	8.79393	9.40991	8.95173	9.93323
Atf3	4.27173	5.12943	4.80452	4.80039	9.16368	11.3492	9.83988	11.4297
Il34	8.79311	8.42722	8.17802	8.36532	11.5586	11.3343	11.1321	11.5257
Egr2	3.78338	4.09626	4.18843	5.03272	8.57188	7.69012	7.77497	8.61846
Bcl3	7.61564	7.58691	7.1394	7.70459	10.1959	10.639	10.1497	10.269
Srxn1	7.06569	7.07318	7.29464	7.55332	10.5062	10.4511	10.3238	11.6069
Rell1	6.28208	5.47834	6.24237	6.19292	9.37594	9.22175	8.77033	9.73018
Myc	7.9476	5.96751	6.7476	7.02569	10.829	11.2649	10.8501	11.4807
Rasd1	5.88787	6.31938	6.62899	6.2266	9.09509	10.1962	9.24665	10.0662
Aim1l	5.94124	4.38309	5.05951	3.60569	9.43037	8.86804	9.26158	9.79427
Tlx2	8.47031	8.47762	7.77671	7.99279	5.58993	5.52987	5.53234	5.53516
Emp1	8.23973	7.31244	7.61576	7.94281	11.0081	10.584	10.6264	11.5738
Slc10a6	3.60981	3.81695	4.35117	3.95424	7.46065	7.27697	6.33607	7.46119
Trpc3	5.44174	4.98581	5.03173	5.4454	2.80988	2.77129	2.16329	2.58892
F3	8.46011	7.43934	7.99992	8.411	10.9606	11.8054	11.3453	12.3172
Fgd3	3.83748	3.48694	3.38253	3.92023	6.77132	6.87716	6.83369	8.25052
Slc16a6	7.83376	8.29233	7.8454	8.37798	10.5294	10.4449	10.5447	10.7357
Fgfbp1	5.68938	5.25075	5.24674	5.86714	7.96015	8.36519	8.14912	8.85594
Rnd1	5.6628	5.66496	5.62603	6.05949	8.53566	9.4264	8.64677	10.0533
Mthfd2	4.28309	4.01421	4.35279	4.60767	7.29901	6.8913	6.99091	8.05721
Crocc	9.85342	9.99018	9.58647	9.97725	6.32571	7.41696	6.01245	6.94625
Hilpda	5.7502	5.14094	5.11511	5.87139	8.1318	8.35537	8.29433	9.13578
1700024P16Rik	5.09482	3.55284	4.06993	4.7302	8.22409	7.85346	7.42272	8.53658
Gm5433	5.75044	5.60546	5.51817	5.55711	2.92434	3.37008	2.47721	3.2688
Cd14	6.95015	6.17071	6.23785	6.54782	9.2486	9.74218	8.85104	9.98113
Ets2	8.91839	8.51991	8.80286	8.99081	11.1272	11.4511	11.3201	12.2125
Tmcc3	9.02821	9.05601	9.1167	8.88664	11.0762	11.3572	11.0817	11.5793
Csf1	7.31503	6.23721	6.92774	7.10522	10.1162	9.63716	9.40426	10.3493
Cldn4	5.89016	5.51416	6.03485	6.07784	8.39354	8.8094	8.76071	9.86844
Zfp101	7.41267	6.93639	6.93381	7.49783	4.99619	4.83563	4.55165	4.92984
2310043J07Rik	2.59108	2.59689	2.31295	2.1141	5.23247	5.02823	4.4795	5.64106
D630039A03Rik	9.66631	9.12692	8.89306	9.88033	6.92129	6.44741	6.15368	6.86739
1700049E17Rik1	4.55474	4.36718	3.70694	4.35713	7.30301	6.46876	7.00364	7.6241
Hdc	2.99902	3.37759	2.62339	2.9148	5.91418	6.30745	5.17935	5.52489
Arc	6.36681	5.22557	5.99517	5.86637	8.92069	9.2985	8.87275	10.4848
Nfil3	6.01719	6.54296	6.15523	6.99269	9.0698	10.0008	9.13937	10.3446
Thbd	7.93706	8.24132	7.86362	8.3671	10.6091	10.2001	10.5507	11.2012
Ptp4a1	9.58883	9.53125	9.51622	9.80218	11.8148	11.7626	11.5176	12.1579
Fam129a	5.79699	5.61063	5.48346	5.91052	8.10373	8.25762	7.88951	9.02612
Pkp3	9.55393	8.9861	9.19276	9.43753	11.4337	11.5254	11.338	11.8179
Lypd3	2.49319	5.06613	3.62215	3.75523	7.78607	8.09141	7.33662	8.21918
Osmr	7.11953	7.56583	6.55572	7.08626	10.0582	9.77601	9.24472	10.2106
Klf5	5.25073	3.9414	4.16718	4.89254	7.90463	7.5927	7.62352	8.96172
Pla2g3	5.54278	5.11484	5.08886	5.22027	3.20753	3.24656	2.88153	3.10704
Sik1	7.14548	6.34546	7.19619	6.77375	9.14137	9.57283	9.12225	9.27845
Vmn1r227	7.42241	6.89132	6.93451	7.20585	4.63425	4.80715	4.33257	5.16901
Nrg1	5.14757	5.10823	4.90682	5.93292	8.28389	7.58797	7.93719	8.72489
Icam1	8.81707	8.20578	8.51897	8.68803	10.8613	11.3212	10.4594	10.9265
Adam8	5.41222	6.04926	5.67017	5.48646	8.67166	8.25213	7.55327	8.2989
Ier5	9.15772	9.0647	8.69681	9.6743	11.509	12.0938	11.2506	11.8512
Gadd45a	9.88385	9.57356	9.55896	10.2329	11.8829	13.1293	12.2867	12.7467
Eif4ebp1	9.39031	8.9831	8.84986	9.11249	11.3469	11.0533	10.9874	11.5054
Adm	7.08313	7.02999	7.59123	7.3239	9.42041	9.19742	9.24657	9.62639
Cd93	8.10511	8.40526	7.8844	8.39274	10.457	10.2967	10.6665	11.3894
E330017A01Rik	5.83344	5.44254	5.91562	5.54795	3.82626	3.70377	3.50441	3.5383
Btg2	8.24349	8.0333	8.70112	8.97573	10.9346	12.3397	11.1858	12.3171
Asns	6.71577	7.70339	6.8484	7.12248	9.88291	9.45325	9.22953	10.0054
Prl3b1	6.41316	5.88671	6.19939	6.28914	4.22779	4.20685	4.1533	3.6867
Gem	4.85724	4.45045	5.164	5.02755	7.64545	7.56042	7.29326	8.86218
S100a8	2.50944	2.64568	4.12031	3.77791	8.41564	8.04869	6.72609	6.54252
Fem1b	5.1917	4.09302	5.0222	5.27504	7.41121	8.74816	7.64876	8.66763
Zfp862	6.03735	5.4924	5.68879	5.98082	3.80764	2.64061	3.3024	3.50428
Gadd45b	6.82583	5.78394	5.66155	6.28191	8.65442	9.61964	8.54014	9.37409
Sfn	5.12908	4.95425	4.75636	5.12648	7.58398	7.53831	7.23838	8.77641
Wnt10a	5.62959	4.53683	4.78583	4.12537	7.15993	7.83378	7.60971	8.14866
Ctps	9.39756	9.30999	9.47072	9.25496	11.4198	11.3024	11.0117	11.5837
C87414	7.19322	6.5782	6.58842	6.49695	4.48889	4.82344	4.54778	4.63172
Cry1	3.5951	2.56931	3.41954	2.32183	6.23823	5.573	5.70074	6.85005
Nr4a1	7.51608	9.11609	8.52663	9.03359	11.2158	11.8838	11.3329	11.9968
Nek6	8.01472	7.18641	7.42553	7.81722	10.0171	9.73271	9.757	10.569
Klhl3	8.32569	7.93041	8.54774	8.53857	6.4984	6.26135	5.96784	6.24176
Edn1	4.62022	4.17163	3.74975	4.63024	6.69798	6.53554	6.2908	6.87921
Adamts1	4.94773	4.76001	5.53182	5.57159	7.84646	7.86833	7.75094	9.18205
Bdkrb1	7.74786	7.56391	7.61564	7.88689	5.93779	5.83547	5.76825	5.41838
Odf3b	7.02414	6.49385	6.39733	6.50882	4.23861	4.45469	4.22539	4.86018
Nfkbiz	6.49975	5.62615	5.94985	6.37767	8.60844	8.82693	8.28656	9.63003
Gas2l3	3.84733	2.11019	3.61477	3.01076	5.87177	6.77115	6.46302	6.01722
Rab42-ps	7.5175	6.45151	7.08762	7.32263	4.54187	5.12823	4.24399	4.41885
Rap2b	3.85174	3.37244	3.75401	4.23472	5.91035	5.89796	5.87352	6.55518
Mterfd3	7.57149	7.44267	7.3744	7.50505	5.28532	5.83428	5.12252	5.61561
Trib1	8.13708	7.39175	8.1569	7.56001	9.99502	11.2698	10.3197	11.4703
Tnfaip3	6.81885	6.18476	6.34647	6.95152	8.84862	9.43537	8.44562	9.23793
Klf4	8.2538	8.43796	8.04725	8.17806	10.1157	11.0192	10.1202	10.9318
Tgif1	6.52171	5.3184	5.85544	7.06287	9.12009	9.17305	8.94098	9.98721
Bag3	9.35305	9.04219	9.35522	9.44322	11.0658	11.369	11.0087	11.4817
1300014I06Rik	6.17079	6.02933	6.15871	6.31291	8.46113	8.32099	8.20514	9.49567
Mafk	7.53218	6.80129	7.53714	7.89906	9.55181	10.1019	9.58343	10.3458
C630050I24Rik	5.5575	5.16416	5.2184	5.34706	3.10435	3.547	3.45914	3.55627
Il20rb	5.34599	4.13103	4.34751	5.05001	7.17339	7.433	6.86213	7.38719
D630023F18Rik	6.9172	6.3862	7.12539	7.97467	4.02497	4.36107	3.64753	4.77336
Rod1	7.22402	7.1109	7.04237	7.27229	8.87995	9.23033	8.83944	9.42636
Rnd3	7.41545	7.63464	7.39592	7.90182	9.57372	10.4447	9.46048	9.8075
Stat3	9.27679	9.0088	9.11477	9.09555	11.0797	11.526	10.8484	10.8926
Slc45a1	6.28738	5.92098	5.84543	5.87812	3.05144	3.68541	3.89306	4.19415
Kcns2	7.40642	6.22504	6.85253	7.17683	4.10054	4.96498	4.34718	4.27939
Hectd2	4.13563	4.24741	3.87078	3.98056	5.84338	6.649	6.05533	5.92907
Cyr61	7.9698	8.23244	8.66146	9.01169	10.6715	12.1092	11.4584	12.7164
Mall	4.68686	4.92812	4.2776	4.67095	6.86566	6.59942	6.44388	7.33411
Lonrf3	5.43952	6.99514	6.09157	6.43632	8.68726	9.41614	8.60366	9.30507
Slc25a33	7.46745	6.95636	7.709	7.27289	9.91139	9.59995	9.04191	10.0682
C230081A13Rik	3.7162	2.71936	3.38056	3.24331	5.84965	5.41935	5.26386	6.31858
Ptpre	5.83259	5.8064	6.17087	5.93743	7.9507	7.76639	7.58162	7.71029
Efhd2	9.10052	8.36402	9.08527	9.08509	11.302	11.0985	10.7766	11.8634
Wscd2	8.90871	9.21464	8.79397	9.0345	7.28729	7.09751	6.46389	7.003
4931408A02Rik	5.95584	4.99957	5.26224	5.68369	7.64114	7.49363	7.62757	8.27373
Rusc2	8.38204	7.65801	8.15748	8.21882	10.1001	10.2352	9.9312	10.7953
Rab30	4.61627	4.09974	3.9586	4.50814	6.42895	6.91038	6.05827	6.33997
Olfr1317	4.97894	4.63659	4.39034	4.36437	2.24863	3.0195	2.32335	2.33028
4921530L18Rik	5.56677	5.66117	5.02651	5.64111	3.15425	3.55281	3.11713	3.77417
2310081J21Rik	6.86575	6.67177	6.74625	7.43123	4.37731	4.83525	4.39096	5.2122
Olfr979	4.2656	4.49699	4.41144	4.55667	2.45045	2.63428	1.9245	2.75873
Nfkbia	10.0724	10.1397	10.5368	10.0086	12.0694	12.4759	11.8014	12.3079
Prrxl1	8.27251	7.8131	8.01583	8.23873	6.04703	5.84546	6.1188	6.54879
Rhbdf2	6.27676	5.83526	6.40216	6.66511	8.1816	8.62148	8.1841	9.02066
Cphx	4.9354	5.19529	4.69314	5.92489	2.88372	2.50355	2.82789	3.20863
Litaf	10.1469	9.61723	9.45824	10.0241	12.066	12.0768	11.5094	12.6597
Tmprss2	9.72742	9.42762	9.75725	9.88482	11.661	11.4632	11.2806	11.9525
Olfr1215	6.88137	6.42919	6.4473	6.58138	4.4857	4.96713	4.65307	4.89808
Atf4	8.17803	8.26849	8.29483	8.29564	10.0645	10.7721	10.5223	11.7466
Arg2	5.68527	4.47067	4.60527	5.26844	7.71325	7.40818	7.19769	8.45867
Gm8300	6.95985	6.93758	6.8916	6.91581	4.68718	4.68251	4.72901	5.56677
Vcam1	6.95375	6.60724	6.68528	6.99987	8.89487	8.92532	8.27311	9.23255
Mamstr	2.39873	2.108	2.55342	2.91013	4.8281	4.76463	4.82187	6.24876
Klhdc7a	8.00983	7.79736	7.62857	7.91349	5.64031	6.22189	6.1351	6.0814
Calml3	4.29793	3.26845	3.44406	3.10701	5.68879	6.30035	5.89889	7.10397
Krt18	9.75364	9.87063	9.15734	9.54283	11.8944	11.6923	11.4281	12.7262
8430408G22Rik	8.72814	7.62335	7.39653	8.63264	12.466	10.5751	11.0076	11.2912
Txnrd1	11.3631	11.2	11.3264	11.5554	13.0909	13.1184	12.8671	13.3908
Tril	6.40496	5.99616	6.02812	6.85003	4.34203	2.95826	3.81947	4.11963
Ppp1r15a	7.02684	6.20715	7.45534	7.72944	9.60248	10.38	9.60778	11.138
Ctrb1	7.33106	7.38095	7.08228	7.291	5.33142	5.64729	5.11245	5.73859
Dusp8	5.83347	6.30627	6.75644	6.75747	8.25271	8.92755	8.59563	9.44859
Fgl2	4.94693	3.76199	4.24484	5.04654	7.94034	7.06544	6.53444	7.70744
Igf2bp2	5.92834	5.39176	6.49616	6.28067	8.02546	8.05164	8.10304	8.66189
Hbegf	8.56461	7.90743	9.51213	8.37111	10.8494	12.6899	11.4326	12.3184
Slc7a5	5.49628	4.06827	4.96765	4.90178	7.47382	7.08714	6.93337	7.90905
Prkcb	5.65579	5.26263	4.86615	5.60698	3.30411	2.52768	2.77469	3.6552
2210020M01Rik	9.19293	8.56714	8.81479	8.81403	7.00691	7.07132	6.07771	6.86211
4831426I19Rik	5.6139	4.83295	5.1323	5.67145	7.17445	7.51452	7.20094	8.06284
Dntt	7.04697	6.56914	6.78332	6.80332	4.86941	4.82251	4.16033	5.23904
Adam3	5.35289	5.23029	5.07749	4.93931	2.75005	3.54191	2.68186	3.48548
Hnrpdl	9.31634	8.87172	8.96414	9.27182	10.8667	10.915	10.6619	11.3774
Olfr338	5.26394	4.54152	4.85153	4.75008	2.90715	3.29105	2.77109	3.03512
Tgfbi	9.28377	8.81324	8.87395	8.98608	11.0381	10.5081	10.6241	11.077
Olfr297	5.50122	4.92093	5.04841	5.03276	3.27383	3.59114	3.15654	3.39996
Sema6b	4.7909	4.76202	4.84299	4.57295	6.56906	6.63906	6.13864	7.0157
Cenpt	5.72147	4.89462	5.36284	5.70591	7.8016	7.42535	7.03994	7.92096
Vmn1r195	6.49539	6.40105	6.28314	6.20726	4.3524	4.71546	3.96973	4.81439
Lrig2	5.79133	5.98742	5.86811	6.23549	7.48973	8.06367	7.56506	7.97685
Pvr	4.39435	3.53807	4.42584	4.68311	6.77406	6.45193	6.64019	8.01914
Ppan	8.51564	8.26382	8.37	8.38001	9.91432	10.002	9.89586	10.2424
Hipk1	5.34368	4.90896	5.34568	5.63564	7.37391	7.29775	6.75635	7.52161
Ppp2r2c	4.90287	4.88359	4.64508	4.87213	2.94605	3.15273	2.71311	3.43604
Rin1	3.86085	3.29379	3.52868	3.83194	6.03053	5.65093	5.59355	7.11667
Prkcz	10.2689	9.79192	9.90365	10.2592	8.11383	8.5757	7.85104	8.31032
Fgd6	4.9714	4.8051	4.83928	5.1543	6.80904	6.82517	6.48048	7.56835
Pcdh12	5.01911	4.62267	4.51357	4.68099	3.24402	3.03144	2.68966	2.91322
Azgp1	10.1347	10.0866	9.80987	10.3169	11.6412	11.9068	11.6171	12.0941
Slitrk6	6.59673	6.30382	6.417	6.51891	3.29074	4.85955	2.99426	4.11962
Tnfaip8l1	4.99614	4.63357	5.10698	5.36713	6.83971	6.94485	6.53043	7.17981
F9	6.34241	6.3619	5.96886	6.16335	4.52233	4.30026	3.90217	4.74679
Sertad1	8.63243	8.2136	8.63654	8.18877	10.0051	10.7789	10.165	11.0776
Map2k3	8.38749	7.71909	8.54211	8.39491	10.2501	10.3025	10.0597	11.186
Cachd1	8.70424	8.19075	8.36871	8.66281	10.3145	10.0875	9.99386	10.3465
Tas2r118	6.55839	6.20437	6.06194	6.15555	3.7242	4.44239	4.19047	4.77372
Cd68	5.41859	4.28173	4.95976	5.47818	7.31408	7.02022	7.15003	8.03892
Prkcq	5.47033	4.51371	4.8362	5.39652	3.17055	3.26632	2.67348	3.07009
Adam5	8.90812	9.22516	8.55191	8.74109	6.74769	7.15698	6.51182	7.33696
Ankrd1	4.76927	4.894	5.19427	4.55408	7.30803	7.12338	6.97631	8.84491
Samsn1	2.68839	2.98	3.04232	2.72206	5.00698	6.02654	4.36851	5.68167
Hbp1	4.79203	4.55392	4.74064	5.0569	6.70588	7.05527	6.24463	7.55868
Rela	9.08083	8.47531	8.92092	9.09363	10.6655	10.824	10.4577	11.3987
Angptl4	12.8239	12.2514	12.2057	11.2415	14.5932	14.3986	14.2232	14.288
Olfr103	5.837	5.40606	5.37732	5.63614	3.74431	3.96228	3.10474	2.59019
Banp	7.73726	8.08462	7.73694	7.89352	5.98096	6.06156	5.61595	6.53796
Vmn1r230	5.24007	4.76932	4.98217	4.71931	3.32857	3.42159	2.63725	2.98681
Tpbg	2.46457	2.67291	2.06304	2.72574	4.49842	4.32936	3.90682	4.32493
Bcl11b	5.78013	5.90763	5.84539	5.89304	4.508	3.86385	4.15966	4.30631
5830418P13Rik	8.82539	9.23042	8.56414	8.61733	6.71635	7.15622	6.53872	7.2914
Gm12770	6.95331	6.46572	6.83684	6.77025	4.83944	4.90009	4.69166	5.46529
Fam164c	4.56278	4.06842	5.10562	5.11443	3.07439	1.96999	2.54353	1.99054
Cxcl10	6.7835	6.04198	7.14678	7.91033	10.7106	11.0798	9.11811	9.87617
Gosr1	4.6534	4.82267	4.48506	4.97937	6.48071	6.82216	6.30975	7.52987
Dnajb9	9.09512	8.51022	9.13632	9.25999	10.8894	10.7783	10.5276	11.387
Glipr2	4.86483	4.42088	4.39002	5.61584	7.00993	7.11949	6.5741	7.55093
C2cd4a	6.17634	5.90533	5.99914	5.90517	4.5302	4.36506	3.91546	4.53449
D230037D09Rik	8.12863	8.19646	8.18064	8.13419	9.63121	9.93018	9.57641	10.3782
Zfp937	5.75706	5.26972	5.82641	5.83254	3.89567	3.43376	2.96605	4.17581
Lingo4	4.73503	3.55863	3.52559	3.57234	5.98692	6.9629	6.06547	5.8675
Jph4	8.44796	7.97465	8.12567	8.21713	6.46407	6.72917	6.44875	6.75377
B230354K17Rik	6.69904	6.71117	6.49712	6.82576	5.40048	4.82794	4.76577	5.12123
Ndfip2	5.17694	4.62955	4.76724	5.13024	6.41779	7.13531	6.51476	6.71209
Crip3	6.41899	5.73213	5.70247	5.88668	4.52626	4.13581	3.72783	3.96964
Ier2	8.21754	7.25842	8.28909	9.04885	10.3045	11.5086	10.4743	11.3689
Cdcp1	8.5896	7.79873	8.22885	8.79406	10.2219	10.2817	10.1276	11.0754
Cxadr	5.26492	4.21822	4.88428	5.01817	6.52947	7.33188	6.67672	6.80346
Nsdhl	5.92423	6.24598	5.66729	6.00552	4.13783	2.91399	3.59938	4.38096
Vps37b	8.42079	7.62343	8.1176	8.39196	9.76669	10.2095	9.79179	10.6434
Mamld1	6.00368	5.43051	5.39368	5.60015	3.89899	3.88234	3.61991	4.2256
Thap2	7.32391	6.64692	7.07888	7.32249	5.53608	4.84721	4.97356	5.56828
Ipo7	5.04782	4.58666	4.96199	5.06096	6.39456	7.10795	6.56848	6.46652
Cast	8.43286	7.71134	8.38393	8.60648	10.2724	10.0376	9.78052	10.4456
Mgmt	5.90258	5.37667	5.30659	5.31031	3.23013	4.12957	3.71494	3.48505
Ddit3	6.53383	6.75999	6.79544	6.64334	8.27742	9.02986	8.49581	9.87717
Hrasls5	5.15766	5.57191	4.82191	5.10176	2.81617	3.4672	3.6974	2.66529
Evc	5.17885	4.62347	4.63038	4.55697	3.34511	2.59293	2.50447	3.10432
Gm9779	6.0552	5.69478	5.72301	6.07091	4.23108	4.28429	3.614	4.43539
Frat2	5.61516	4.66969	4.88613	5.43239	7.07052	7.14946	6.70564	7.60123
Arl4c	7.50549	7.54423	7.33857	7.33295	8.71326	9.18037	8.93994	9.45285
Scrn1	6.81261	6.21469	6.24982	6.54233	4.93673	4.96382	4.47943	4.79012
Bbc3	7.4629	7.19099	6.54189	7.82465	9.20337	9.42497	8.94056	9.70678
Gm9975	5.7707	5.78498	5.03087	5.9118	7.80128	9.32705	7.55791	7.95033
Pknox2	5.99116	5.48873	5.49517	5.52432	3.86181	4.27348	4.06082	3.87577
Pprc1	7.86155	7.2059	8.03539	7.80257	9.41936	9.31114	9.33427	9.78169
Kynu	5.63131	5.59687	5.44059	6.0409	3.56931	3.81069	3.75376	4.44071
Lmna	9.23357	9.1986	9.29302	9.40636	11.1062	11.2243	10.8016	12.2581
Acsl4	6.62839	6.81508	6.82145	7.16109	8.47003	8.60709	8.18682	9.00311
Spint2	8.22364	7.43641	7.89121	7.87142	6.34314	6.2511	6.0866	6.23133
Dusp14	6.76778	6.41216	6.91873	7.2226	8.40822	9.02789	8.69186	9.82023
Plxna2	6.05035	5.85884	6.06038	6.32932	7.78252	7.71702	7.5415	8.56935
Jmjd1c	7.43104	6.57051	7.13302	7.61139	8.86752	9.37249	8.81245	9.59152
Pim1	4.83868	4.32922	4.26235	5.16242	6.80255	6.68305	6.17297	7.50952
Tdo2	4.59813	4.05126	4.39102	4.36328	2.43507	2.65473	2.27252	3.1229
Dusp4	8.014	7.81976	8.44408	8.17367	9.7601	9.68846	9.46959	9.89993
Tgm1	8.53427	7.68794	8.00878	7.99743	9.76769	9.80073	9.47184	10.0378
Ighm	7.91035	7.30575	7.44365	7.91551	6.11254	6.09016	5.55201	6.02096
Bmyc	7.13176	6.13179	6.76906	7.05117	8.49842	8.72717	8.3418	8.97144
Rasip1	7.9953	7.18095	7.98096	7.98144	9.79639	9.51215	9.53081	10.6514
Trpv6	4.30806	3.95128	4.03489	4.32198	5.61272	6.0103	5.47209	6.25872
Tmem45a	5.32703	4.58645	4.70672	5.00459	7.23944	6.53013	6.53471	7.77967
Kcne4	5.35649	3.21903	4.20572	4.2993	6.75845	6.90751	6.88814	8.27526
Ugcg	4.98627	4.84357	4.96978	5.26346	6.43113	7.18053	6.36884	6.87264
Pcsk1n	5.88831	5.58362	5.47173	5.63969	4.32385	4.06116	3.55668	4.11868
Tbck	5.61845	5.0174	5.15049	5.35269	3.91719	3.52288	2.81161	3.50874
Fcgr3	6.33761	5.78781	5.93453	6.03547	7.75522	7.68968	7.28418	8.1509
Cpe	8.9481	9.00378	8.36203	8.59577	10.5273	10.2153	10.1371	10.7019
Birc3	7.21272	6.62545	6.8842	7.09312	8.63749	8.86466	8.24426	9.27532
Olfr441	7.25975	6.99622	6.96502	7.03384	5.41614	5.68199	5.25704	5.79043
Zfp750	6.32163	5.72054	5.18384	6.56307	4.31421	3.29214	2.83175	3.62112
Zbtb40	7.75107	7.749	7.67113	8.11264	6.20211	6.19233	5.83447	6.59562
Havcr2	3.53796	3.44599	3.50723	3.06926	5.14815	4.63582	5.19785	5.76666
Zfp14	4.80612	4.38311	4.10462	4.53759	2.74049	3.08275	2.26932	2.87975
Sdcbp2	4.26029	4.08188	3.12324	3.72081	6.15672	5.97774	5.41578	7.06254
Mthfd1l	6.3629	4.84673	6.24908	5.53731	8.01932	7.92143	7.57446	8.31199
Gsc2	5.74782	5.41504	5.50637	5.5342	4.02388	4.2871	4.0001	4.12968
Dusp2	2.55955	2.04873	3.00778	2.45366	4.20444	5.32595	4.29863	5.761
1190002H23Rik	9.74977	9.85148	9.95915	9.16811	11.7832	11.1319	11.1694	11.7718
Nt5dc3	7.37997	7.42506	7.77684	7.38118	8.82674	9.10692	8.86579	9.04162
Phlda1	8.23342	7.68176	7.7682	8.48336	9.46279	10.3288	9.90556	10.8501
Col13a1	4.73819	5.2153	4.88421	5.28296	7.07963	6.7162	6.26299	6.74076
Atat1	7.9493	7.68867	7.64773	8.00241	6.43921	6.22425	6.08997	6.53972
Ppm1j	5.05365	4.98217	5.44902	5.44457	7.07639	6.75083	6.77081	7.85976
Clca2	4.69041	5.37134	5.077	5.28003	7.30296	6.72584	6.50556	7.69981
Acnat1	10.162	9.84308	9.69322	10.487	8.64038	8.08306	8.02402	8.54036
Hbb-y	5.82831	5.5275	5.84012	5.72305	3.88551	4.27146	4.01836	4.55864
Sostdc1	11.3076	11.2771	10.9675	11.1236	9.8791	9.84028	9.18412	9.3902
Taok2	5.71918	5.57996	5.39401	5.31897	4.21893	4.01873	3.21077	3.25642
Ngf	5.81138	3.60786	5.10188	5.42713	7.62406	7.2041	7.75197	8.32481
Procr	5.33672	5.46464	5.03627	5.51507	7.75995	6.6736	7.96491	8.89366
Pigg	5.70471	5.55789	5.84187	5.87344	4.08508	4.11831	3.94847	4.63914
Olfr1371	6.63887	5.54522	6.03533	6.08344	4.47391	4.56052	3.92922	3.77474
Gata6	5.0315	4.69721	5.07356	5.24753	6.74969	6.39476	6.33209	7.00142
Nr4a2	3.60814	4.564	3.55761	4.27965	5.83715	6.33619	5.89977	7.38289
Otos	6.10737	5.70286	5.62381	5.69278	3.84665	4.46479	4.00623	4.43341
Spns3	8.53596	8.09615	8.13419	8.79776	6.58116	7.05705	6.84171	6.43361
Olfr791	5.38963	4.70919	5.00611	5.21677	3.63613	3.69155	2.92459	3.29344
Gm16010	5.15898	5.18479	4.82327	6.32376	2.83131	2.66004	1.96069	3.75382
Tmprss3	5.31282	4.91319	4.86829	4.55229	3.44222	3.02829	3.13739	3.56646
Havcr1	5.44582	4.80713	4.62809	4.676	7.60438	6.32861	6.98561	8.20886
Eno2	4.1152	2.58066	3.71141	3.55853	5.71214	5.35696	5.32226	6.1065
Anxa2	8.10227	7.54473	7.56883	8.05351	9.99463	9.3731	9.49079	10.8408
Fndc4	4.32831	3.92163	3.67844	4.36265	5.82592	6.644	5.60299	7.2246
Gm16381	7.02639	7.13229	6.78664	6.91528	5.1587	5.37521	4.98376	5.86444
Zfp948	5.61509	6.34476	5.83863	5.84814	7.66197	7.67755	7.23837	8.36852
Mtfp1	10.2291	10.3387	10.2413	10.2878	8.85063	9.12726	8.59876	8.79334
2210403K04Rik	9.83963	8.31716	9.706	9.33302	11.2646	11.6627	11.2127	11.355
Hspbap1	7.33626	7.04772	7.08995	7.46108	9.08101	8.4685	8.66837	8.79079
Gm5662	7.14983	7.03698	7.28211	7.47954	8.83459	8.65909	8.6166	9.4945
Nfkb2	6.65877	6.21317	6.84622	6.69644	8.3425	8.16462	8.1508	9.27316
Bbs10	5.77672	5.45787	4.79713	5.72463	3.61303	2.49587	2.16518	3.77986
Zc3hav1	7.13284	6.3809	6.89255	7.06728	8.90649	8.88708	8.06536	8.63995
Rhou	5.2988	6.40123	5.63495	5.57334	8.14988	7.61195	7.08812	8.08129
Gm12504	9.60391	9.21167	9.55621	9.53274	7.78346	8.17979	7.82818	8.20525
Mrps2	6.5564	6.26425	6.30937	6.2857	4.99638	4.93267	4.61741	5.10387
Oasl1	5.61593	4.80426	5.10598	5.64512	9.37683	9.40033	6.84575	8.03146
Olfr1507	5.06601	4.64605	4.79173	4.51344	2.8198	3.48845	3.27782	3.21964
Aldh1a7	7.68981	8.02039	6.99385	7.47347	10.3984	8.8876	9.53332	9.96849
Ptgfr	7.78766	8.02392	8.20967	7.81096	9.1032	10.0585	9.52737	10.0919
Cirbp	10.4309	8.78894	9.83276	10.1193	11.9076	12.0072	11.5823	12.067
Gm13111	6.6346	6.25891	6.04718	6.66474	4.97841	4.89966	4.21353	4.8451
Rybp	5.46598	4.87583	5.7639	5.76478	7.0221	7.72744	6.98015	8.035
4933406B17Rik	5.78079	4.64253	5.45541	5.42298	3.71628	3.61948	3.66152	3.47927
Gigyf2	6.45766	6.49324	6.65208	6.83658	5.18052	4.95602	4.3576	5.31856
Col2a1	6.24479	5.09239	5.10874	5.45373	3.85104	2.7867	2.98434	3.7801
Dgkh	4.98501	4.29686	4.50063	4.77765	6.15322	6.58576	6.24571	5.93187
Abl2	2.95835	2.59466	2.48845	3.19721	4.49885	4.29092	4.13442	4.76402
Hpcal4	3.83047	3.75044	3.53227	3.55909	5.36142	5.30743	4.86357	6.06838
Trp53inp1	7.514	8.28203	7.78785	7.53268	9.61076	9.38235	9.1412	10.1553
Rasa2	6.97777	6.45569	6.77561	7.07006	8.3434	8.45972	8.13169	9.0536
Spert	6.83007	6.07829	6.32033	6.06829	4.5412	5.06582	3.99164	4.50882
Stx11	4.56021	4.03579	3.86892	4.36933	6.31402	5.78794	5.82282	7.2443
Olfr821	6.04897	5.68236	5.88649	6.03235	4.57866	4.44546	4.16556	4.67086
Il4ra	7.15307	7.23513	7.14429	7.33714	9.01874	8.86989	8.42441	9.78864
Purg	7.14341	7.13127	7.1247	7.1198	5.80145	4.9744	5.05023	5.92355
Prr15	8.77696	8.10827	8.72817	8.71708	10.0907	10.5414	9.94845	10.068
Vim	10.1608	9.60985	9.72379	9.99005	11.749	11.1515	11.1868	11.6783
Riok2	8.43603	8.13728	8.33638	8.47721	9.81652	9.84612	9.54992	10.427
Cdk5r1	4.53428	4.46512	3.5576	3.61865	5.64788	6.30017	5.61315	6.39188
Zfand2a	6.08635	5.73458	6.15566	6.37589	7.71236	7.73635	7.65068	8.87861
BB042571	4.33431	4.50476	4.25606	4.22564	3.29614	2.64457	2.77518	2.64938
Rhoj	7.72077	7.27044	7.25206	7.76297	9.5232	8.89993	8.75886	9.34116
Pth2	4.94449	4.49668	4.49311	4.43384	3.34431	2.83469	2.1106	2.95097
Tacstd2	6.91589	6.99314	6.72084	6.95762	8.61403	8.49552	8.70108	10.0838
Mgat3	10.6466	10.2503	10.547	10.6293	9.03811	9.36278	8.7313	9.05856
Ipcef1	7.11212	6.64639	6.82096	7.41573	5.67625	5.09615	5.09782	5.59101
Slc6a11	5.42685	5.09569	4.99808	5.61772	3.9053	3.59339	3.64012	3.99589
Syt17	5.1384	4.86997	5.43986	5.51705	3.37211	3.11493	2.0632	3.81638
Cdc25b	7.79808	7.23657	7.3091	7.75361	6.11217	6.16143	5.6902	6.08114
Tsc1	5.59373	4.93033	5.49366	5.67031	6.96157	7.0773	6.67315	7.30481
Mlkl	4.62615	4.22448	4.25942	4.78937	7.18356	6.41565	5.59728	6.85954
Osgin1	10.843	10.2941	10.9662	10.175	11.7784	13.2838	12.5325	13.0587
Rab3a	8.84147	7.7468	8.59476	8.6201	7.046	6.6973	6.36873	6.68843
Olfr1181	5.31228	5.07701	4.12799	4.06683	2.2602	2.61919	2.69757	3.03256
Klk15	4.84178	4.48831	4.48062	4.76288	3.2447	3.45409	2.95753	3.23817
Fam169b	6.45584	5.89852	6.29954	6.0041	4.31202	4.99983	4.13809	4.70267
Cabp1	4.96961	4.52432	4.55982	4.86449	2.89283	3.40844	2.92199	3.53306
Ramp3	8.34546	7.89144	8.12459	8.47356	9.57156	10.0448	9.63408	10.6984
Cryaa	6.3363	5.03778	5.79504	5.71718	7.41128	7.61894	7.53151	7.28541
Rab3gap2	7.87656	7.6801	7.56647	7.78608	9.01371	9.33015	8.9438	9.74724
Pdgfa	9.85125	9.49719	9.44101	9.64673	10.9375	11.2428	11.1836	12.1907
Csnk1d	7.31928	6.9332	7.68231	7.82832	8.96506	9.42774	9.03364	10.2377
1600029D21Rik	10.2177	9.91759	9.6772	10.083	12.2353	11.8326	11.3188	13.1946
Cttnbp2nl	5.03315	4.5273	5.5494	5.51119	6.91406	7.15042	6.71732	8.03468
Hpvc-ps	5.04735	4.48539	4.37849	4.91081	2.76512	3.55148	2.86103	3.10461
Rftn2	5.48567	4.66252	4.85134	5.52171	3.14692	3.50246	2.79104	3.77893
Gm9766	2.33717	3.21784	2.27913	2.93212	4.16794	4.61652	4.20865	4.98603
Eif1a	8.47834	8.24226	8.52283	8.85098	10.1364	9.91914	9.76921	10.5779
Avpr2	8.80208	8.20584	8.27993	8.59796	6.93362	6.83446	6.56115	7.31651
Tdh	4.60235	4.41993	4.17787	4.44546	3.02289	3.09196	3.13259	3.02968
Mblac2	7.81274	7.48604	7.48718	7.72206	6.17203	5.98627	5.6478	6.53273
Cd244	3.21401	2.88953	3.2101	3.47076	5.31929	5.03915	4.20948	5.07136
Kcnc4	5.90421	5.39436	5.30382	5.2762	3.86272	3.91887	2.8289	3.95693
Ccl17	3.80019	3.4538	3.34675	3.18566	4.76771	5.16844	4.67611	5.20026
Slc25a22	7.22638	6.21142	7.46129	7.40041	10.2465	8.59432	9.08263	9.83875
Ostb	9.29526	9.11608	8.99171	9.08631	10.4905	10.5436	10.2388	10.6839
Fam117b	5.41352	4.79405	5.68645	5.70098	7.02339	7.28497	6.71657	7.13748
Gm13253	10.684	9.98289	10.2331	10.2242	8.96433	8.97419	8.6295	8.66066
Hecw2	2.78424	2.71439	2.51136	2.6645	3.76543	4.25021	4.39403	4.99777
6720489N17Rik	7.3429	6.68509	7.10394	7.40309	5.79983	5.16196	5.241	5.81974
Fut9	6.15149	6.27228	5.99584	6.4027	4.7514	5.11478	4.71875	4.44593
Olfr1226	6.17626	6.38256	6.12434	6.30056	4.57304	4.80162	4.15847	5.16505
Lrrc66	9.74319	8.78475	8.82521	9.35092	7.70759	7.38156	7.35446	7.68326
Slc5a12	10.7035	9.93213	10.557	10.77	8.7275	9.09084	8.92457	9.04382
Slc35e4	8.17309	7.37888	8.09642	8.12128	9.51766	9.59416	9.24645	9.5498
Tiparp	8.49449	8.58781	8.3891	8.7187	9.90563	10.7439	9.76425	10.9116
Ccdc61	9.36045	8.94722	9.07238	9.19482	8.01896	7.74043	7.43573	7.71395
Nos3	5.93716	5.76515	5.92948	6.31543	7.93196	7.42406	7.86013	9.23504
Rbm3	10.9177	10.1205	10.4692	10.7085	12.1316	12.0098	11.8829	12.6169
Atp7b	8.72812	8.1912	8.56663	8.47391	7.2517	7.0166	6.77969	7.20127
Dos	7.33887	6.50464	6.75002	6.93906	8.37614	8.81073	8.18181	9.25224
Syncrip	6.63535	6.11175	6.34787	6.88577	8.16501	7.89459	7.76921	8.29219
Ddhd1	4.69032	3.3958	4.19089	4.31637	5.88315	6.21189	5.6028	6.61923
Sass6	7.044	6.62142	6.5997	6.84059	4.8831	5.39644	4.9228	5.67015
Snhg5	6.82034	6.55006	6.536	6.82036	8.32363	8.07792	7.73685	8.45464
Ushbp1	6.93852	7.11035	7.03656	7.14516	5.22387	4.98409	4.26022	5.97114
Cenpe	7.55968	6.58788	6.67401	6.95195	5.47861	5.19815	4.16212	5.08821
C730049O14Rik	4.74034	4.8192	4.32487	5.15975	7.0216	6.56314	5.84817	6.81607
4933415A04Rik	6.66896	6.16048	6.21048	6.372	4.9174	5.08103	4.56175	5.0755
Strc	4.09849	3.79168	4.16932	4.39751	2.98191	2.51419	2.69525	2.35192
Chek2	5.17131	4.12565	4.93735	5.13415	2.63304	3.01018	2.79752	3.58342
9230114K14Rik	5.76358	5.30621	5.42901	5.69398	4.06474	4.16264	3.38296	4.26787
Lpin2	10.5007	10.0008	10.0962	10.1839	11.4792	11.6895	11.4368	12.0948
Ier3	7.88618	8.42527	8.80755	7.98546	9.73552	10.4393	9.93917	11.2094
Bmf	6.11119	5.75316	5.88538	5.97778	4.37434	4.48501	4.26179	4.90409
Iqcc	5.61496	5.19368	5.35663	5.69548	4.00368	3.05066	2.96038	4.22914
Fam38a	11.5061	10.8725	11.0739	11.2484	12.4884	12.7915	12.4375	12.6541
Pde4b	7.57997	6.44587	7.0902	7.80765	8.92385	9.79682	8.8042	9.47065
Cdr2	9.58833	8.72935	9.80703	9.67202	11.2737	11.1217	10.801	11.5357
Vasn	9.06614	8.94027	9.6005	8.70141	10.3721	11.1802	10.5179	10.8957
Otud4	5.30069	4.6129	5.20942	5.50842	6.75369	6.67616	6.44029	7.00559
Nfatc4	7.61775	7.03346	7.22381	7.25705	5.7243	6.02202	5.33311	6.01612
Zmat1	6.74213	6.00602	5.93261	6.1354	4.47668	4.81424	4.13618	4.87848
Sav1	9.12444	8.48042	8.96799	9.12829	10.9459	10.2023	10.2548	10.5772
Bhlhe40	10.306	8.85591	10.2678	9.72471	11.4052	12.1126	11.652	11.8707
Ppp2r1b	3.03717	2.56138	2.23088	2.21141	4.17543	4.03572	3.78098	4.15583
Amica1	3.26745	3.30338	3.22434	3.30605	5.27342	4.38638	4.50638	5.01158
Riok1	6.76361	6.46452	6.46957	6.86684	7.83481	8.28876	7.8355	8.38378
Ppp1r27	7.92531	7.98598	7.42534	7.66215	5.96817	6.54416	6.22193	6.45515
Fas	7.58488	7.45863	7.41911	7.62933	9.17247	9.16521	8.43667	9.21372
Ncam1	7.15708	6.65336	6.5693	6.55758	4.87703	5.73232	4.78529	5.0253
Fos	5.21868	3.2678	5.95616	7.29707	8.56131	10.6985	9.03068	10.0325
Rcan1	4.64898	5.21004	6.43095	5.66228	7.40996	8.45901	8.0801	10.0288
P2rx3	6.58062	5.63695	6.01648	6.27863	4.58453	4.53749	4.46978	4.8321
Azi1	7.78755	7.36916	7.24451	7.68378	6.04587	6.24934	5.56703	6.24242
O3far1	3.31712	3.75036	2.91424	2.45056	4.94832	6.2542	4.66227	5.31839
Rcor2	6.27961	5.23284	4.96523	5.60028	3.76721	3.48887	3.25693	4.13175
1810064F22Rik	5.80692	5.24629	5.22943	5.35114	3.79949	4.01436	3.67913	4.29572
Ppl	7.02545	6.25762	6.02549	6.51681	8.99221	8.13154	7.91366	9.63625
Tmem210	7.18069	6.99339	6.98351	7.1174	5.75134	5.71805	5.34164	5.99954
Prrx2	4.9971	4.03524	4.02794	4.76502	2.90891	2.70715	1.63327	2.67859
Ptpn22	5.432	4.2708	5.27134	5.377	7.89546	7.60953	6.54374	6.76939
Ascl1	4.62418	4.51545	4.53372	4.8368	3.32658	3.19072	2.95105	3.56168
Pak6	7.65895	7.67877	7.18725	7.30823	5.80591	5.81648	5.36569	6.4428
Spaca7	5.05727	4.79233	4.62762	4.8859	3.76278	2.80099	2.80588	3.51678
Mmgt2	5.47783	5.85089	5.23997	5.60067	3.52375	3.65054	3.59546	4.62731
Tbxa2r	6.29934	5.60836	6.24565	6.53847	4.17735	2.4323	3.59163	4.70339
Sema4c	3.71813	4.65493	4.20278	4.64653	6.37261	6.44607	6.22352	8.37622
Ssb	8.00023	7.52443	7.87961	7.95625	6.63315	6.50505	6.20959	6.58795
Muc5ac	5.0378	4.90068	4.8781	5.15285	3.38164	3.57155	3.4924	4.02366
Fam123c	5.01666	4.66445	4.72695	4.72815	3.67081	3.53436	2.90339	3.29494
Dixdc1	7.48738	6.42531	6.35227	6.80251	5.34996	4.86664	4.47203	5.21934
Ubr2	9.24319	8.57568	9.14446	9.17174	10.4827	10.5761	10.1613	10.6804
LOC100504785	3.34174	3.03201	3.14053	3.23378	4.61413	4.68473	4.14874	4.80436
Olfr418-ps1	5.10612	4.44979	4.11569	4.44534	3.13251	2.82368	2.33085	3.16083
Ccdc88c	8.58494	8.18026	8.11698	8.04213	9.51202	9.93721	9.35119	9.78605
Shc4	4.50642	4.4538	4.24412	4.45445	3.19474	3.26343	2.6076	3.08795
Rec8	9.5293	9.07197	9.14292	9.57234	7.80939	8.28288	7.23434	7.65988
Cars	8.09517	7.73179	7.85716	8.18589	9.37243	9.24412	9.19782	9.99504
Tacc2	12.2141	11.7187	11.825	12.0222	13.4585	13.3636	12.9807	13.4699
Olfr139	4.93796	4.4736	4.44606	4.48261	2.79333	3.49655	2.71473	3.29455
Mef2d	10.414	10.0497	10.2803	10.2188	11.4586	11.5996	11.3534	11.7779
Krtap4-13	4.8928	4.09956	4.49168	4.84482	3.10833	3.20265	2.82811	3.28732
1700003E16Rik	4.655	4.2068	4.10536	4.32081	2.46209	2.99436	2.63645	3.25264
Srgn	8.33386	8.80037	8.39157	8.72707	10.036	9.9402	9.65042	10.4289
Wfdc15a	7.18576	7.26179	6.67534	6.94514	5.23288	5.68978	5.04675	5.91732
Ly9	4.10901	3.65076	3.87415	3.77103	2.45248	2.2234	2.3292	2.85443
Wap	5.50474	4.80191	4.4687	4.63705	2.98456	3.4043	2.77929	3.55142
Tmem158	7.23768	7.03117	6.75068	6.96581	8.66649	8.20386	8.1019	8.55858
2210011G09Rik	7.85581	7.64675	7.54783	7.92702	6.2963	6.65939	5.91743	6.46684
Olfr60	6.48166	5.8677	5.91481	6.03689	4.36756	4.15831	4.0662	5.1334
Pnpla5	5.36191	5.03493	4.56952	5.19336	3.5147	3.33031	3.53825	3.90672
Pppde1	5.72344	5.75841	6.17106	6.17733	7.30252	7.43575	7.10577	7.94476
Lhfpl4	5.22934	5.44685	5.07959	5.10191	3.76893	4.05976	3.82087	4.0465
Rhob	8.14348	6.67581	8.43546	8.13138	10.116	9.96586	9.52549	9.96771
AI848100	6.1942	5.97119	6.44459	6.40385	7.52147	7.84823	7.62602	8.71343
Slc2a1	10.3693	9.88595	9.76961	10.2908	11.7731	11.6446	11.1205	11.6133
Map4k4	6.63637	6.18426	6.71864	6.99881	8.23286	8.17016	7.99437	9.23607
Evc2	4.99393	4.46161	4.4848	4.76204	3.5863	3.23847	3.04036	3.30826
Kif5a	5.72111	4.99018	5.23752	5.20049	6.74741	6.74777	6.51363	6.62905
2210416O15Rik	5.11347	4.03869	4.29094	4.35928	6.20885	6.11231	5.77387	5.95551
Plekho1	9.47528	9.2897	9.38275	9.42942	10.9187	10.4792	10.5349	10.7799
Serpina3g	6.05367	5.55674	6.42852	6.62257	8.52647	8.87474	7.4195	7.84544
Cd53	3.80904	3.1868	3.40114	3.95019	5.65132	5.2328	4.63193	5.84564
AW552889	5.33797	4.96521	5.24712	5.40097	3.79777	3.71717	3.59781	4.27027
Gsg2	6.02241	4.89176	5.44789	5.56145	3.46988	4.10275	3.22802	4.10627
Slc38a2	3.73743	3.42569	3.25995	3.8189	4.74707	5.49607	4.86459	5.88605
Tspan18	8.65044	8.10199	8.46484	9.06856	7.26142	7.09926	7.14682	6.79239
Hivep2	5.92412	4.23412	5.68766	5.85217	7.41603	7.59807	7.20354	8.38293
D330045A20Rik	5.65006	6.00035	5.45957	5.54862	4.23013	3.90292	3.23535	4.53071
9030607L20Rik	5.46227	5.00405	5.4467	5.44694	6.62361	7.10119	6.38871	7.20297
Tmie	7.36121	7.11114	7.00625	7.27721	5.72637	5.56908	5.25907	6.25391
Ralgds	8.73297	8.68605	8.48346	8.87432	10.2595	10.2676	9.61484	10.1541
B4galt6	7.11086	5.72601	6.48317	6.73345	8.27988	8.39591	8.09468	9.44409
Samd5	2.92297	2.92741	1.8925	3.00042	4.36544	4.16902	4.35801	4.2312
Pappa	7.09222	6.46747	6.60298	6.87625	8.42136	8.20978	7.77941	8.34996
Eif6	8.5123	7.95337	8.58587	8.77436	9.85049	9.81526	9.84064	10.6082
AI118078	6.02694	5.70197	5.84024	6.08764	4.40817	4.52468	4.1844	4.95921
Lhx4	6.2388	5.35694	5.63766	5.89667	4.44914	4.41164	4.00053	4.42212
Slc19a2	8.75631	8.56667	8.72878	8.83296	9.85874	10.6097	9.80769	10.6506
Cdsn	3.88106	4.02269	3.4085	3.79927	2.53329	2.52966	2.08222	2.49746
Zfp521	5.07012	4.72684	4.30565	4.69772	3.42757	2.26253	1.58432	3.09969
Folr2	8.09416	7.73058	7.91161	8.04777	6.43443	6.41403	6.36177	7.04259
Gm10229	5.42867	4.90956	4.84933	5.16657	3.75291	3.61439	3.15504	3.97572
Mthfsd	6.44795	7.0513	6.28516	6.67817	5.25293	4.54506	4.79608	5.49256
Acot9	9.1606	9.17173	8.85999	8.95619	10.2967	10.4858	10.1727	11.1363
Phactr1	7.91702	7.78854	7.9151	7.90858	8.85712	9.48466	9.08114	9.39556
Olfr1122	5.37711	5.05737	4.82536	5.32715	3.2962	3.63366	3.50334	4.19695
Mfsd7b	7.57731	8.31257	8.24165	7.76557	9.49088	9.33391	9.16223	9.781
4930563D23Rik	6.27864	5.85558	6.08418	6.37397	4.84974	5.08099	4.14632	4.56996
Zfp59	4.71499	4.56615	4.43297	4.70081	3.26172	3.42966	3.37332	3.45925
2010109K11Rik	6.95704	5.67031	6.90199	6.73899	8.32738	8.42479	7.93939	8.51477
Olfr225	5.75244	4.77819	5.58587	5.68868	3.81671	4.03183	3.87187	4.11414
Gm5766	9.9024	10.073	9.75847	9.75497	8.67921	8.75609	8.32225	8.65659
Dnajb4	8.51072	8.82162	9.0267	8.60745	9.93395	10.4671	9.89181	10.8774
Rasgrp2	7.92481	7.71906	7.73098	7.82507	6.40794	6.71132	6.36549	6.72473
Rfx4	5.71476	5.57711	5.30197	5.42519	3.91441	3.93104	3.45415	4.60507
Olfr128	5.25559	4.95994	4.81783	5.14045	3.89719	3.52024	3.69655	3.92314
A930004D18Rik	5.90548	6.06967	5.48989	6.21691	4.70635	4.00627	3.65945	4.68855
Osbpl10	8.77434	8.21476	8.50539	8.82992	10.0673	10.0227	9.78038	9.76779
Tmem169	5.3905	4.56817	5.23187	5.77529	2.83043	3.70548	2.77132	3.97978
Narf	6.66083	6.33346	6.71176	6.58315	5.19678	5.49707	4.33575	5.10081
Il1r1	6.7726	6.63338	6.48472	7.106	8.78222	7.99621	7.87125	8.96194
Kcnk12	5.26691	4.06202	3.91469	4.03896	2.77061	2.66141	1.79061	2.51058
8430406I07Rik	8.35533	8.14672	8.18513	8.43403	7.06598	7.15978	6.82367	7.13953
Tnc	5.91909	4.64069	4.72447	5.44862	7.75019	6.73905	7.63883	9.42133
Apobr	4.80235	4.16244	4.27873	4.40237	5.90553	5.58412	5.74269	6.61449
Sepsecs	4.4293	3.41722	3.96326	4.16181	2.51175	2.28309	2.64195	2.67409
Sh3bgr	4.27536	3.96881	3.84935	3.87434	2.6557	2.24138	2.06318	3.05334
Gnl3	7.82277	7.29384	7.72987	7.99816	9.30213	8.93568	9.05178	10.0849
4933406C10Rik	6.41534	7.3464	5.40382	6.40828	4.49175	4.49609	4.08783	4.63907
1110034G24Rik	7.45935	7.10447	7.05354	7.5765	6.0554	5.88412	5.69361	6.21661
Jun	7.43726	7.35904	8.52554	8.37324	9.5206	10.2304	9.3278	9.87956
Tnip2	7.35583	6.93046	7.34398	7.28171	8.60977	8.70302	8.3782	9.59409
Hdhd3	8.53169	8.28604	8.1124	8.70835	6.94561	7.45564	6.78488	6.89145
Tnip1	8.56259	7.93805	8.04437	8.53996	9.50867	9.88749	9.4381	10.2409
Lrrc31	4.26382	3.79645	4.28936	4.05489	2.32822	2.50421	2.21936	3.24959
Tmem173	6.56253	6.20539	6.13665	6.41274	7.94301	7.66397	7.28956	8.3138
Rnf152	8.56023	8.48085	8.33601	8.59212	7.41647	7.45349	6.91519	7.0113
Gnpda1	10.3205	9.86251	10.6772	10.8218	8.6136	8.52491	8.2929	9.43218
Mpp3	4.72907	3.63839	4.48268	4.73551	5.66527	6.32402	5.87377	6.32091
2310057N15Rik	5.32632	4.90428	5.09136	5.07809	3.76177	3.69981	3.27052	4.13745
Fam55d	5.21189	4.46189	4.60923	5.02294	3.80291	2.8554	2.90773	3.40008
Bpifb9a	4.83755	4.32608	4.22586	4.68205	3.54194	3.11277	2.83471	2.9084
Ctdp1	6.17575	5.67505	6.29809	6.43906	7.67422	7.56481	7.41483	8.60454
Mmd	7.2225	6.93592	7.08658	6.98796	8.07027	8.63302	8.25261	9.06004
Ldb3	6.53584	5.67019	6.01984	6.17155	4.67411	4.8301	4.16947	4.84387
Gm10664	9.42884	8.73573	8.48313	8.91635	6.92227	7.17683	6.32001	7.83887
Epyc	3.93321	3.74281	3.99284	4.15738	2.32357	2.64823	2.30155	3.05607
Prlr	4.84626	4.70886	3.86196	5.53521	2.69213	2.72498	2.79449	3.37081
Tssk5	6.49746	5.7177	6.08031	6.45025	4.73343	4.96199	4.55894	4.93013
Pgm1	6.84086	5.66544	6.82344	6.82074	8.26622	8.16927	7.87893	8.56451
Bglap	4.66478	4.44592	4.98319	4.74621	5.88038	6.03644	5.80503	6.27709
Mkks	7.49096	7.2939	7.52035	7.81606	5.86486	6.13205	5.97694	6.62964
Fam101a	6.04977	6.08474	6.01596	6.6161	4.01045	3.35511	4.70186	5.05488
Olfr812	5.68164	4.95256	5.01035	5.20684	4.14236	3.57233	3.29619	3.89445
Gm5622	3.8059	3.31581	2.99334	3.19829	4.83008	4.46386	4.77444	5.5175
Paqr6	5.40792	5.15812	5.22338	5.2246	4.00533	3.74927	3.19956	4.26132
Gm15545	5.02123	4.46987	4.2184	4.84504	2.92614	2.42723	3.36542	3.43255
Smad1	9.06442	8.51965	8.91734	9.0781	10.3621	10.5813	10.008	10.0423
Entpd1	5.40423	5.17378	5.10737	5.48208	6.95971	6.30312	6.49131	7.30005
Zyx	11.2091	10.3128	10.9989	10.9948	12.2304	12.273	12.1103	12.5
Cpne5	7.29887	6.70435	6.78204	6.9849	5.52318	5.61223	5.32956	5.93786
Ttc9c	6.17387	6.10693	6.46605	6.47622	4.95021	5.06764	4.66272	5.31182
Tnp1	7.20368	7.19034	6.99051	6.88969	5.61206	5.92487	5.75617	6.03707
Ercc1	8.65238	7.80449	7.9927	8.39146	9.92047	9.43948	9.52687	10.5153
Rps6ka3	6.29615	5.82603	6.1122	6.55382	7.55422	7.66981	7.56591	8.77327
Prss3	5.86447	5.42754	5.25789	5.37753	3.86004	4.51626	3.73541	4.17948
1700105P06Rik	4.56887	4.06533	4.05962	4.7174	3.10626	2.08887	2.40211	3.19466
Duox1	8.35183	7.53517	7.75885	7.99612	6.5804	6.49455	6.20044	6.78822
Scgb1a1	5.33936	5.38321	5.13414	5.29378	3.87475	3.8666	2.44493	3.87693
Taf1d	6.9995	6.46507	7.1177	6.97595	8.15841	8.27354	7.98984	8.30607
Fam110c	5.98687	5.18092	5.83597	6.32506	7.21953	7.61088	7.11442	8.11484
Lyrm7	4.25335	3.63123	3.93386	4.29799	2.68927	2.89043	1.87596	2.56677
Bsnd	7.25454	6.66921	7.5774	7.44463	5.79707	5.19342	5.15121	6.18594
Klf3	6.96309	5.90289	6.88982	7.33264	8.22092	8.65066	8.24814	9.00662
Rock2	4.29459	2.9163	3.74322	4.29438	5.94538	5.30257	5.68602	7.05702
Akap2	7.44627	6.68675	7.50749	7.94858	9.29645	8.72327	8.86872	9.90146
Grhl1	3.38431	3.91713	3.03972	3.6652	5.52371	5.02307	4.49798	5.73894
Duoxa1	4.68749	3.73566	4.07023	4.21687	2.69923	2.72268	2.83616	2.95024
Nupr1	8.65405	8.52105	7.61886	8.47812	10.467	9.88628	9.57608	11.2024
Sema3f	5.97012	5.53077	5.92656	6.01876	7.34501	7.06123	6.94709	7.91096
Dlx6as2	7.28392	6.59398	7.03156	7.18962	5.55359	5.48509	5.46958	6.07062
Sun2	10.3392	9.88225	10.0399	10.0725	11.4453	11.3044	11.053	11.6015
Olfr1459	5.50409	4.8175	5.00303	5.03362	3.76835	4.04034	3.73188	3.57163
Clca1	4.95308	5.7161	4.99799	5.3352	7.44566	6.6875	6.27299	7.52895
Prop1	5.74009	5.28327	4.95836	5.44454	4.03641	4.05936	3.8002	4.22101
Sox7	5.38692	4.50869	4.96628	5.57484	6.7516	6.3905	6.44699	7.12919
Rrp1b	4.93442	3.58986	4.81087	4.58631	6.14388	6.39674	5.87803	7.20138
2410004P03Rik	7.54217	7.72926	8.0547	8.19422	6.653	6.61506	6.44303	6.69606
Prex2	4.72378	4.23957	3.88999	4.26786	2.6478	2.94981	2.63302	3.25425
LOC639910	5.76065	5.13762	5.58038	5.7621	4.25727	4.42845	3.2607	3.97689
1700007K13Rik	5.26875	5.34204	4.9611	5.35389	3.91815	4.18405	3.59099	4.11057
Mmd2	3.55621	3.94949	3.99413	4.53315	2.74602	2.7917	2.01134	2.44581
Slc12a4	8.32864	7.5866	8.05933	8.22791	9.40446	9.28634	9.28675	10.0697
Vpreb1	7.08222	7.47009	6.64202	7.11229	6.02284	5.78205	5.23309	5.51076
Tbc1d2	6.52793	6.07262	6.27598	6.05388	4.7477	4.94524	4.80049	5.29653
Kcnk1	10.3368	9.19361	9.50417	10.0729	11.3645	11.2252	11.0894	11.53
1700020C07Rik	4.94414	4.37984	4.42002	4.78938	3.1176	3.25681	2.74091	3.68326
Zkscan2	4.64453	3.71293	4.34316	4.33658	2.53881	3.2756	2.74552	2.51289
Fzd1	9.72525	9.30853	9.35993	10.1477	8.55702	7.59126	7.64653	8.31754
2310042D19Rik	6.9893	5.76081	5.9962	6.49624	5.02765	4.21266	4.41122	4.8957
Zbtb12	8.04816	7.6319	7.54983	7.83811	6.58515	6.72186	6.45942	6.37272
Ctla2b	6.43833	7.00219	6.46715	6.52941	8.12395	7.96347	7.75786	9.04214
BC060267	6.74694	6.07681	6.36386	6.66343	4.39636	5.22834	4.51003	5.4229
Dmbx1	6.06039	5.38919	5.61066	5.68729	4.40562	4.614	4.15711	4.43114
Cdkl1	9.24969	9.1278	8.92337	9.40842	7.62979	8.02298	7.08541	8.10952
Rab19	7.23551	6.73437	6.70426	7.04656	5.87875	5.68661	5.12637	5.61747
Mast4	7.15771	6.12842	6.76008	7.17722	8.19609	8.70565	8.06934	9.25148
Olfr1316	5.05821	4.87738	4.7893	4.95787	3.66176	3.95432	3.57758	3.76656
Zfp536	4.63978	4.23793	4.02259	4.38924	2.7743	3.18063	2.86088	3.27826
Cdt1	8.34096	7.73601	8.07843	8.29895	9.26346	9.458	9.26788	9.45899
Pfkfb4	8.75893	8.13755	8.15484	8.41545	9.81285	9.66893	9.41102	9.6961
Cyp3a13	3.43704	2.42391	3.20599	2.49681	4.34578	5.9936	4.28212	5.50419
Gatm	12.8081	12.043	12.9432	13.1683	11.2231	11.4536	11.1206	11.3279
Lrrc8c	4.41654	3.79667	4.38668	4.59697	5.7405	5.57257	5.63118	6.68378
Adra1d	6.92325	6.23308	6.60365	6.5809	5.11061	5.15576	5.36339	5.55451
Rasgrp3	6.40131	6.68342	6.43914	6.82498	5.42814	4.63526	4.9374	5.60723
Ifi204	6.67613	6.5917	6.47729	6.81756	9.58182	9.1598	7.50493	8.4276
Gulp1	6.84384	6.7825	6.55302	7.0264	5.6722	5.13037	5.12257	5.84584
Slc1a6	4.52791	4.18772	4.06271	4.31569	2.92792	3.2193	2.95295	3.16473
Tgds	7.10092	6.99407	7.0707	7.15073	5.76329	5.91154	5.62716	6.18638
Chst11	4.49758	4.66904	4.50053	4.46423	5.70119	5.81342	5.48807	6.2914
Alppl2	5.60236	5.10319	5.32614	5.45974	3.93196	3.98526	3.87579	4.50673
Gast	5.76664	5.2519	5.6446	5.62245	4.45786	4.22942	4.0483	4.52877
Nxph4	8.5499	7.94369	8.08901	8.23988	6.86565	6.94813	6.49417	7.20341
Krt19	6.50576	7.20886	4.47593	5.7312	9.77165	8.43785	7.92674	10.0917
Fras1	7.94224	7.46674	7.68179	7.80405	6.49757	6.61042	6.09263	6.64479
Insm2	3.31807	3.55858	3.41686	3.41378	2.00348	2.59057	1.97915	2.16578
Crlf2	8.66475	8.32935	8.43751	8.65084	9.72124	9.88763	9.48648	9.76097
Olfr29-ps1	4.79916	4.78035	3.791	4.38196	2.88625	2.6613	3.3095	2.00774
Zfp30	7.00142	6.9326	6.68586	6.84378	5.99039	4.88603	5.0904	5.63515
Calca	6.05602	5.95435	5.6821	6.01941	7.05958	6.99362	7.1297	7.66996
Stmn4	5.48594	5.12182	4.85427	5.05131	4.00299	4.10614	3.47831	3.32187
Stk40	5.61879	4.9961	6.22297	5.95142	7.23506	7.54848	7.17606	8.7291
LOC100503001	5.31021	4.9965	4.93096	5.2283	3.69388	3.82422	1.93028	3.20238
Camk2n2	8.50152	7.35236	8.03419	8.12061	9.49907	9.4467	9.25976	9.51087
Lamc2	8.33934	7.34071	7.88376	8.1186	9.5784	9.55814	8.93085	10.1632
Wdr67	5.27544	4.68167	4.56213	4.99124	2.9657	4.08822	2.69353	3.07621
Angptl7	7.09618	6.80583	7.37581	6.15153	8.85221	8.14244	8.14348	8.92666
5730559C18Rik	4.29058	5.21602	4.88984	5.29953	6.21225	7.00293	6.74877	6.09255
Clrn3	10.046	9.58974	9.83203	10.2281	11.1656	11.0493	11.1255	11.7718
Olfr123	4.9753	4.53508	5.03537	4.59906	3.74974	2.82669	3.10112	3.6849
Gnl2	9.45017	8.8513	9.16468	9.37727	10.3952	10.5411	10.2465	10.6261
5330426P16Rik	3.02606	1.97841	2.23635	2.76096	4.30488	3.7252	3.98626	5.15649
Ywhah	10.8391	10.9813	10.6643	10.9951	12.015	12.1685	11.7916	12.3556
Anks1b	4.29124	3.80057	4.13205	4.21285	5.45853	5.31633	5.06509	5.44042
Zfp93	7.5384	7.34296	7.16486	7.56922	6.36307	6.01488	5.80884	6.39629
AY074887	5.87141	5.59426	5.38068	5.14538	4.54071	3.95864	3.48283	4.15432
H2afb1	5.64168	5.00143	5.27974	5.22551	4.15957	3.90806	3.84202	4.25037
Gapdhs	4.30274	3.64874	4.34859	4.60335	2.72084	2.31422	2.08416	3.28957
Zfp467	7.76922	6.5784	7.6114	7.55412	6.07247	5.36164	5.30197	6.11671
D230015J17Rik	4.93897	4.21937	4.76234	4.89548	5.86667	7.10961	5.89767	6.45686
Tbkbp1	5.8533	5.47883	5.37699	5.54218	4.39462	4.54472	4.17157	4.39192
Ctsc	8.14504	7.72678	7.84339	8.02529	9.18984	9.24242	8.82037	9.59776
Zfp879	4.71466	4.80208	4.65758	5.36658	3.52241	3.25914	3.33396	3.96769
Pold1	7.91924	7.22232	7.27413	7.69687	6.44228	6.0628	5.6326	6.34453
...2	6.4188	5.4276	6.19191	6.52306	4.78221	4.77335	4.7279	4.62744
BC065397	6.14899	5.89632	5.77967	5.9172	4.88569	3.83497	4.47293	4.84928
Flt3l	5.23053	4.6158	4.96102	5.68042	3.78381	3.49791	3.16464	4.01448
Gm14420	6.58937	5.56012	5.95355	6.09161	4.5525	4.432	4.2539	5.07115
Tbc1d4	4.96015	4.69422	4.35009	4.67887	3.40514	3.61938	3.1893	3.55968
Ctla2a	6.7249	7.52771	6.83191	6.9021	8.48414	8.40358	8.21513	9.5629
Itga5	5.04045	3.39404	5.42339	5.46096	7.22436	6.3487	7.42088	8.22679
Olfr339	5.53922	5.80039	5.44339	5.69072	4.26382	3.27344	3.92098	4.73036
Atf6	8.14951	7.80678	8.06165	8.24377	9.25685	9.26918	9.01046	9.603
Olfr744	8.49658	7.85408	8.46944	8.7898	6.91097	6.9992	6.95715	7.35819
0610007L01Rik	9.95841	9.69463	9.79949	9.92461	11.061	11.0654	10.7385	11.1243
Pdxp	3.78952	4.30102	4.29514	4.08811	2.86851	2.31239	2.08212	3.22891
Tert	7.06527	7.34893	6.61061	6.71265	5.65023	5.56851	5.23709	5.91676
Odf4	7.03545	6.44676	6.50079	6.62887	5.58776	5.42559	4.9615	5.48939
Rgs2	9.76579	10.203	9.84115	9.54776	11.202	11.1011	10.7791	11.3243
Robo4	10.1604	9.53041	9.76073	10.3235	11.4371	11.3119	10.9521	11.3623
E130304I02Rik	4.37528	3.96547	3.97446	3.89393	2.27838	3.30266	2.59107	2.28328
Stk17b	6.56694	6.07827	6.66488	6.65399	7.65633	7.92569	7.48935	8.31046
Adamts15	8.82452	7.95689	8.11176	8.75306	7.12353	6.88113	6.18821	7.18341
3110007F17Rik	4.6495	4.34756	4.05617	4.5789	2.68773	2.94773	2.37201	3.60032
Dusp1	10.4804	9.41992	11.1626	10.4687	12.0115	12.6725	11.7832	12.3148
Eml6	5.35747	4.46766	5.14571	5.15203	3.62798	3.81069	3.10804	3.87197
Car1	6.58545	6.1718	5.98824	6.05	4.92214	5.04509	4.95757	5.09567
Baz1a	8.10277	8.29535	8.35471	8.22188	9.30428	9.80439	9.49203	9.18157
Hist2h3c1	11.8381	11.3963	11.4631	11.7813	12.6956	13.2128	12.5929	13.4776
Impact	9.15626	8.82773	9.06001	8.98469	10.249	10.1772	9.89887	10.604
Six5	7.41667	6.39784	6.97621	7.36	5.92126	4.85472	4.95189	5.73816
Cd22	3.52317	3.28564	3.47678	3.86015	2.14361	1.89299	2.005	2.73795
BC010981	6.55009	6.35742	6.65655	6.59504	7.67757	7.65226	7.51813	7.83349
Fat3	4.60445	3.90977	4.21029	4.29274	2.24207	3.30392	3.01175	2.68829
En2	4.99905	4.67457	4.71478	4.72674	3.70299	3.69984	3.54262	3.68059
Foxi2	5.09224	4.74763	4.8008	4.91275	3.2834	3.76086	3.3455	4.03598
9230110F15Rik	5.93458	5.556	5.63323	5.57584	4.26625	4.78154	3.94576	4.53471
Tuba1a	9.32723	9.0777	9.01461	9.57858	10.6099	10.329	10.2714	10.8385
Gm2740	4.77584	4.67168	4.39642	4.55582	3.29734	3.39092	2.89949	3.72789
Dyrk3	5.85237	4.88638	5.08609	5.48482	6.65017	6.87343	6.39642	7.18872
Slc36a1	10.2912	9.23636	10.0852	10.4266	8.25661	8.85845	8.30647	8.56075
Hspa4	7.45796	8.41582	7.3061	7.73355	5.58839	6.17425	5.48134	6.75107
Fam25c	7.07753	7.15508	6.28189	6.72036	8.15449	8.33889	7.83431	8.30293
2610027H17Rik	7.27141	6.2954	7.06524	6.90841	8.12844	8.35706	8.05653	8.32305
Zfp667	5.34782	4.60906	5.17695	5.17193	3.78925	3.44771	3.67795	4.13033
Slc25a32	7.04635	6.4891	7.03126	7.07362	8.19854	8.08469	7.91284	8.57976
St6gal2	5.03121	3.86665	4.72661	4.37522	3.32065	2.89362	3.17978	2.78112
Fam181b	5.0447	4.33449	4.18434	4.84728	3.68659	2.91251	3.0561	3.03209
Mdh1b	5.06723	5.06289	4.43303	4.95732	3.54078	3.77054	3.32862	3.8277
Herpud1	12.8674	12.2827	13.1221	12.4928	13.939	14.1319	13.8084	14.0127
Cenpj	7.1948	6.97331	6.90851	7.53116	5.73619	5.9928	5.31994	6.16985
Tmem59l	7.03985	7.32555	6.81575	6.95462	5.90528	5.77081	5.60624	6.08609
1700026L06Rik	5.14325	4.7498	4.74868	4.63476	3.33697	3.29391	2.17091	3.80358
Tubb2a	5.33596	5.77363	5.47723	5.97753	7.26803	7.0117	7.14074	8.86392
4930523C07Rik	5.67354	3.8145	4.76693	4.84269	6.61896	6.56495	6.1886	7.31494
1700013G24Rik	4.51113	4.02955	3.97947	4.57558	3.00641	2.84028	3.13224	3.18871
0610009K14Rik	7.57408	6.42066	5.95603	6.09066	8.16467	8.36976	8.05509	8.21412
Fam107b	8.10121	6.99025	8.34731	8.51046	9.5933	9.79461	9.32998	10.3668
Ptprk	8.79213	8.41598	8.56326	9.13577	7.41723	7.21068	7.15264	7.84339
Lyzl4	5.5855	4.98988	4.84358	5.54038	4.05743	3.66534	3.20716	4.15871
Hspa12a	6.94768	6.30171	6.99162	7.22176	5.12277	5.27114	5.12064	6.02688
Ifna2	5.34498	5.37135	4.83575	5.01652	3.97609	3.87519	2.80053	3.86621
Gm14326	8.3183	6.89572	7.71547	7.89111	6.09041	5.93345	5.89151	6.56435
Zfp36l1	10.7681	10.2847	10.5572	11.157	12.0278	12.0249	11.6923	12.2648
Klk11	4.43072	4.13761	3.93781	4.69145	2.87811	3.20767	2.93211	3.19007
Rbm12b	5.79894	5.4578	5.55636	5.31666	4.1402	3.31178	3.85719	4.72872
Vmn1r201	7.49762	6.58541	6.97313	7.13247	5.65357	5.792	5.4936	6.01165
6230427J02Rik	4.85712	4.82011	4.90916	5.23348	3.86646	3.13474	3.42676	4.06134
Klk10	4.98046	4.72298	4.89049	5.06367	3.58157	3.80721	3.78043	3.97465
A530099J19Rik	4.84897	3.7719	3.76336	3.73238	2.65969	2.18537	2.0355	2.88659
Frmd4b	9.63507	8.34372	9.59128	9.55744	10.8687	11.0632	10.4667	11.2888
Ell2	9.18452	8.29967	9.18284	9.18767	10.4281	10.3189	10.0252	10.578
Lce1l	6.46414	5.94082	6.0515	6.28442	5.22861	5.06267	4.18976	4.69639
Plcd1	8.40153	7.9486	7.7129	8.10303	9.42011	9.44503	8.89932	9.92515
Plcxd2	3.30265	3.0915	3.63004	3.81305	4.9499	4.67273	4.45687	5.511
Cxx1c	6.59194	6.0782	5.97908	6.70226	4.93436	4.64667	4.75452	5.4714
2700007P21Rik	5.57045	4.77887	5.4471	5.71858	6.62865	6.60985	6.57907	7.07944
2410017I17Rik	6.68183	6.12895	6.15567	6.45779	5.22573	5.13597	4.97824	5.34704
Cd5	6.26703	5.80889	5.91713	6.08643	4.89042	4.60856	4.78296	5.10951
Pole2	4.47472	4.09943	4.40154	4.57833	3.29049	3.29262	3.08685	3.34582
Ccdc21	7.56753	5.92421	7.69192	7.64333	9.4901	8.86892	8.74351	9.69562
Gpr116	7.21587	6.56168	6.95914	7.27637	8.34081	8.28062	7.93832	8.6144
Ido2	8.44877	7.70488	7.98133	8.11415	6.54228	7.23636	6.20348	6.67146
1700016M24Rik	4.46476	4.37228	4.28754	4.64685	3.04439	3.38421	2.6522	3.54502
Trmt61a	6.30071	6.13992	6.46098	6.61287	7.92253	7.20833	7.81367	8.68229
Sema6d	5.54401	4.80189	5.32137	5.99458	6.98145	6.69886	6.85098	6.65881
Gpr173	5.90755	5.45173	5.65642	5.90517	4.57347	4.19708	4.0631	4.901
Rims1	4.45655	3.51328	3.90699	4.04377	2.62035	2.46885	1.83706	2.99337
Cpb1	4.49202	3.84468	4.32441	4.49098	2.63074	3.38682	2.77148	3.10299
Cep57l1	6.35603	5.41646	5.97123	6.2415	4.97777	4.54908	4.21519	4.69203
Nop56	9.41889	9.17879	9.21208	9.27006	10.4656	10.2579	10.2121	10.572
Mtnr1b	5.0915	4.59425	4.74837	4.91521	3.80601	3.59886	3.85831	3.40421
Gabbr2	7.24883	6.54245	7.07846	7.0149	6.00505	5.86104	5.55053	5.36085
Elf3	7.37752	6.40798	7.2197	7.41591	8.5828	8.961	8.2214	9.86499
Atg4d	9.41282	8.67466	9.09607	9.15046	7.77573	8.10767	7.86115	7.75899
Snhg1	4.39034	3.43316	4.27408	4.22453	5.39015	5.46326	5.34187	6.45972
1700020N15Rik	5.49226	4.98688	5.71437	5.7839	4.28048	3.53986	3.31034	4.53496
Fabp1	5.22023	4.81072	5.20556	5.00018	3.84939	3.93155	3.87284	4.1108
Olfr1153	9.39861	9.03143	9.11411	8.99901	8.22839	8.04536	7.91975	7.79605
Rgs16	5.07007	4.48884	4.51615	4.57146	5.79004	5.9597	6.1906	7.32851
Adat1	5.98517	5.66193	5.85525	5.97828	4.75272	4.53781	4.57272	5.03142
Ddo	8.62882	8.24922	8.46028	8.47068	7.0513	7.42506	6.96299	7.58703
Sgsm1	5.45228	5.34997	5.81418	5.78974	4.09025	4.12386	3.33593	4.78945
Clcnkb	7.53811	7.57829	7.56675	7.60244	6.15941	6.76128	6.26413	6.51929
Fam123b	6.73332	6.65124	6.27022	6.6427	5.00377	5.45637	5.44994	5.61441
Hbq1b	4.84302	5.13566	4.6005	4.7179	3.74273	3.2694	3.25182	3.95606
B430306N03Rik	4.02766	3.78699	3.72076	3.88763	2.81236	2.24441	2.23188	3.03365
A830093I24Rik	4.19778	3.45587	3.87754	3.87169	2.53817	2.28346	2.58118	2.95934
Scd3	5.31606	5.18399	4.98907	5.21492	3.8634	4.21386	3.29593	4.16696
Tpsb2	4.4118	4.14106	3.89223	3.83433	3.15548	2.79534	1.99283	2.69828
2210012G02Rik	6.10946	5.56124	5.77217	6.08533	4.72075	3.72638	3.79308	4.98113
Map3k14	8.52952	7.54515	7.96705	8.03	9.29369	9.36503	9.06042	9.87802
Ccna2	6.09252	5.67205	5.7524	5.84576	4.59223	4.8307	4.28565	4.90612
Bcar1	10.2934	10.2194	10.1667	10.3507	11.1724	11.6455	11.3894	12.4111
Ip6k2	9.48327	9.23796	9.50276	9.40953	10.5711	10.6669	10.2633	10.5356
Fancg	7.13448	6.69	6.8426	6.93339	5.93282	5.94494	5.27656	5.58013
Cflar	8.52517	7.22985	8.30693	8.46565	9.85614	9.41384	9.45058	10.1768
Jam2	4.63062	4.81491	4.0264	4.11086	6.14367	5.6998	5.35674	6.70103
Nufip1	8.46812	8.32452	8.22131	8.45584	9.44794	9.62475	9.22278	9.58209
Zfp41	6.69538	6.07354	5.9822	6.56772	5.19228	4.49191	4.54282	5.38357
Kif26b	3.84397	4.6326	3.40274	4.10123	5.39623	5.58423	5.15392	6.39054
9430008C03Rik	8.33729	7.66522	8.02776	8.34568	9.29799	9.17257	9.19015	9.60447
Speer5-ps1	5.54088	3.0656	4.54499	2.71711	6.41873	7.12995	5.97464	6.75363
Sh3rf1	6.14187	5.72534	6.42494	6.55442	7.29126	8.12141	7.2454	7.82965
Krt23	6.30021	5.88746	5.82842	5.94073	8.27733	7.67027	7.16115	9.81624
Fign	6.26114	6.12847	6.05407	6.40701	5.39227	5.13194	4.71083	4.40505
Hcn3	4.04702	4.39096	3.9866	4.37362	3.08632	2.43636	3.02425	3.24903
Gtf3c6	8.36074	8.31274	8.25051	8.37699	7.23426	7.39812	6.99774	7.34524
Npc1	6.51235	5.74468	6.61166	6.6874	7.87414	7.71205	7.38258	8.34015
Sytl4	5.60312	5.4386	5.8506	5.81623	4.71884	4.67631	4.39694	4.44724
Nop58	8.35224	8.46634	8.25099	8.34185	9.38484	9.46563	9.27525	10.0103
2022-03-06	8.57863	8.18052	8.59655	8.8431	9.74854	9.87515	9.41945	9.96077
Itga6	9.31853	9.91465	9.08198	10.2213	11.0536	11.1028	10.7434	11.6379
Dnahc11	5.33229	4.92959	4.24549	5.56535	3.35623	3.78814	2.74704	3.67565
Inf2	7.21761	6.38883	7.09729	6.88323	8.47474	7.97969	7.95773	8.96158
Mypop	6.63255	5.55522	6.37767	6.31984	4.69793	4.5857	4.33225	5.33729
Phf13	8.4311	7.99554	8.43805	8.37483	9.63933	9.31208	9.29076	9.49988
Crygd	6.07467	5.65564	5.92453	6.20643	4.77714	4.69493	4.57382	5.12114
AI426330	6.92708	6.46578	6.53954	6.49354	5.54817	5.26776	5.0889	5.73739
Fnip2	9.80291	8.68687	9.83234	9.2064	10.8928	11.1768	10.7786	10.5118
Fancd2	4.59674	3.9184	4.33952	4.14613	2.96206	2.82041	2.78697	3.44115
5930434B04Rik	5.71709	5.1262	5.23623	5.33343	3.95578	4.42852	3.75634	4.32671
Olfr661	5.35876	4.95507	5.05214	5.25597	3.34093	3.98327	3.86909	4.324
Bcl2l1	5.38663	4.66458	5.86406	5.71489	7.27812	6.85893	6.42746	7.77988
2310058N22Rik	5.79306	5.30851	5.0884	5.33342	6.49402	6.90495	6.34289	7.4618
Il1b	3.90119	3.32924	3.91434	5.15212	6.5775	7.01934	5.46226	5.59274
Tff1	6.16866	6.34997	6.12092	5.99161	4.8678	5.25575	4.98444	5.14101
2810474O19Rik	9.88749	8.99727	9.61247	9.09167	10.9572	10.8616	10.326	10.7906
Pclo	6.83206	6.22317	6.29839	6.6614	5.24152	5.38736	4.90485	5.56192
Gm19888	4.85075	4.06727	4.4446	4.52143	3.07995	2.96336	3.49913	3.39584
Tcf15	5.72023	5.89601	5.24	5.56531	4.88867	4.15663	3.96267	4.11071
Tinagl1	6.70168	5.48345	6.93957	7.02424	8.74328	7.68872	8.24395	9.2792
S100a3	6.01401	6.13134	5.72598	5.74168	4.51034	5.10269	4.50638	4.77579
Tspyl4	8.32302	7.69891	8.03759	8.40181	7.12394	6.74959	6.58727	7.0655
2810006K23Rik	5.41717	5.26968	5.34916	5.29433	3.42227	4.16439	3.88189	4.58819
Pdxk-ps	5.28864	4.37586	5.65586	4.77559	6.5789	6.53833	6.09324	7.0733
Fabp7	7.35988	8.04045	7.08359	8.25034	5.99919	6.17837	6.06965	6.6383
1700048O20Rik	4.45485	4.31898	4.19627	4.62517	3.22492	3.1024	3.57512	3.20662
Fam46b	7.96608	6.02368	7.66966	6.9409	9.33989	8.84975	8.74685	8.9631
Veph1	6.4976	5.81328	6.10479	6.5007	4.47952	5.32157	4.53637	5.13373
Tbc1d15	8.67555	7.95996	8.42587	8.54909	9.68293	9.59039	9.36918	10.3491
Olfr32	4.45194	3.9647	4.13006	4.23911	3.13186	3.32592	2.8409	2.96042
4933432I09Rik	6.50226	6.104	6.13198	6.21676	4.60748	5.00781	4.7163	5.53813
D14Abb1e	6.817	6.67762	6.75355	6.75985	5.69714	5.89469	5.65422	5.56268
Zswim3	5.61991	5.58524	5.35718	5.74362	4.49237	3.28779	3.57034	4.70838
Arf6	9.89494	8.92471	10.0815	10.254	11.3403	11.3733	10.9414	11.3398
Hist2h2be	6.75429	6.91976	6.35099	6.90394	5.20774	5.31302	4.96586	6.04174
Olfr430	8.13188	8.07413	7.92513	7.95627	6.92979	7.20257	6.92297	6.66534
Pf4	5.56018	5.80901	4.9537	4.81187	6.84581	6.46117	6.47484	7.58455
Wdr78	7.29786	7.56721	7.05671	7.38263	6.52212	6.11326	5.59464	6.09055
Ints3	8.34147	8.0779	8.13576	8.42249	7.18161	7.20749	6.86022	7.32359
Slco4a1	8.96845	7.43792	8.03337	8.30064	9.63617	10.3766	9.27963	10.2108
Atp1a4	4.28798	3.74325	4.19536	4.36028	3.05682	3.04025	2.64263	3.14845
Akap17b	4.00392	4.13461	4.11624	4.21419	2.47104	3.39247	2.18181	2.98667
Hcn4	6.18822	5.18743	6.09258	5.75694	4.40765	4.4309	4.29541	4.8208
6030499A19Rik	8.34159	7.58599	8.0928	8.3145	9.26947	9.68473	9.18061	9.14541
Ppp1r18	7.79241	6.30153	7.37666	7.48406	9.02662	8.39973	8.69036	9.40264
Pds5b	7.11742	6.73696	6.79041	7.03065	5.85199	5.42012	5.2719	6.14679
6430548M08Rik	5.97007	5.15184	5.78338	5.7979	6.97486	6.9141	6.58946	7.20755
Dennd2a	6.07322	5.39913	5.74915	6.06709	7.17772	6.72573	7.06738	7.85964
Fry	4.27828	3.868	4.04846	4.05579	2.90572	3.13621	2.20718	2.99593
Hsd3b1	6.82499	6.1146	6.40272	6.61802	5.589	5.11985	4.60005	5.34504
5730522E02Rik	6.19116	5.73263	5.80449	6.09167	4.59342	4.83698	4.39014	5.16716
Zfand5	9.35874	8.92476	9.37395	9.52624	10.6279	10.2923	10.2176	10.8941
C030015A19Rik	5.28885	5.09282	5.35083	5.14862	4.45148	4.08533	3.74904	4.07122
Ern2	3.98837	3.85464	3.93732	3.95767	3.17105	2.94298	2.40259	2.55714
Klf7	7.46086	7.28738	7.17797	7.33898	8.21932	8.5915	8.243	9.05411
Gcnt2	5.28457	4.62803	5.27948	5.41767	6.15441	6.6464	6.1669	6.90852
Ccdc45	6.33186	5.69533	5.99632	6.07068	4.54309	4.57695	4.18997	5.34738
Ahctf1	8.63188	7.84396	8.5737	8.64403	9.65489	9.73738	9.36791	10.0285
Dock5	4.40898	4.13279	4.37934	4.64498	5.29266	6.58005	5.79809	5.52773
Olfr353	3.30622	3.30133	3.45793	3.29748	2.38002	2.22397	1.77703	2.46383
Tmem54	5.79766	5.5643	5.72591	5.88206	4.31092	4.44638	4.20837	5.10844
0610012G03Rik	6.01348	5.64831	5.6267	6.07981	4.32773	4.53387	3.79983	5.11358
Mmp28	4.76537	3.84931	6.4756	3.61738	2.82601	1.88937	1.6512	2.322
Glt25d2	6.5751	6.05391	6.32513	6.61474	5.29346	4.94663	4.5238	5.55504
Nkx6-1	5.47725	5.68499	5.50339	5.42761	4.36105	4.40497	4.00493	4.76608
Tmem80	8.06964	7.94823	7.61561	8.17016	6.72908	6.63957	6.44624	7.20033
Ppp3r1	6.96319	6.28233	6.94234	6.9743	5.83561	5.50611	5.29847	5.69734
1810032O08Rik	9.11829	8.75591	8.90202	8.87751	9.79687	10.2096	9.85155	10.6385
Xrcc6bp1	8.00512	7.70321	7.5933	7.50397	6.74731	6.55871	6.27999	6.74254
Hrh3	6.22552	5.34527	6.00613	5.81997	4.80939	4.72879	4.18121	4.64915
Fdxacb1	6.64611	6.36922	6.66627	6.96919	7.68814	7.93887	7.53096	8.08516
Anxa3	8.72362	8.77375	8.33632	8.92192	10.0676	9.57387	9.69469	10.4775
Mrps25	8.15035	8.26131	7.94792	8.27151	7.28946	7.22413	6.76767	6.9566
Rapsn	5.23239	4.59966	4.91931	5.06028	2.88917	3.42488	3.37008	4.31173
Ttc14	7.52633	6.80989	6.76522	7.40494	6.14329	5.8341	5.82217	5.86569
Klf11	6.60187	5.62455	6.46794	6.75275	7.44072	7.92223	7.5343	8.19282
Gk2	6.05591	4.93285	5.83032	5.94876	4.32445	4.4811	4.09444	4.51806
Hspa5	12.1188	12.5256	12.2237	12.7589	13.3528	13.9214	13.3477	14.1664
Dgkd	4.61563	3.75018	4.69582	5.03965	5.68074	6.42984	5.64344	6.61324
Tyms	4.02391	3.81871	3.47582	3.79768	2.36952	2.51673	2.75238	2.93876
Gstm5	11.177	11.1014	11.0063	11.2745	12.1791	12.1109	12.0766	12.804
Blnk	10.4917	10.3934	10.2553	10.1053	11.1904	11.8999	11.1749	11.9443
Arl4d	6.81998	8.66426	6.91097	7.13609	5.70125	5.99218	5.38488	5.23229
Papd4	7.86582	7.68987	7.84707	7.9055	8.78087	9.02199	8.70185	9.59177
Cdk5r2	7.06992	7.49039	6.07796	6.18183	4.66816	5.38067	4.88979	5.43499
Fmnl2	7.56073	7.08072	7.03632	7.55544	8.93685	8.348	8.13895	9.01129
Rep15	6.13763	5.92521	5.464	6.07991	6.69617	7.38928	7.20476	7.13819
2410141K09Rik	6.45272	6.19281	6.29675	6.45089	5.10139	5.49089	5.08759	5.43652
Zc3h12a	4.09674	2.41274	4.09379	4.31138	5.29523	5.85672	5.31632	5.62731
Tmc8	7.61049	6.83916	7.13647	7.42121	6.18468	6.07589	5.92987	6.2186
Cyp4a12a	9.51325	9.83014	9.3184	9.29207	10.5674	10.5522	10.6972	10.4541
Bdkrb2	4.92252	4.29103	4.38979	4.86937	3.51994	3.50439	3.26426	3.6077
D130043K22Rik	4.22546	4.37085	3.75686	4.84131	2.27386	2.1831	2.83103	3.54369
Rassf1	8.87088	8.41476	8.87572	8.49868	9.44458	10.0921	9.80556	10.5724
Cml5	8.89768	9.78085	9.28746	8.09587	10.5215	10.5491	10.3945	10.7247
Rab3il1	7.59279	7.73779	7.7493	7.94479	5.94619	6.50845	6.02071	7.14428
Egr1	8.72017	7.03966	9.92648	10.4282	11.2802	13.1038	11.416	12.1345
Fam120b	6.84177	5.87048	6.22304	6.48591	4.91988	4.80921	4.40171	5.58083
Brd2	11.5533	11.4281	11.4088	11.3943	12.4454	12.7308	12.1779	12.8598
9130023H24Rik	7.03335	6.30714	6.74573	7.30979	5.8498	4.64098	5.04379	5.76066
Gabrb2	4.92124	4.3183	4.61595	5.11502	3.568	3.11967	3.42639	3.88289
Rrad	5.19848	5.09065	4.93651	5.63872	6.64648	6.28081	6.4597	7.87584
Cacnb4	6.49531	6.427	5.88058	6.3265	5.40563	5.20555	4.83703	5.10876
Myo9b	10.0581	9.36921	9.77141	10.0146	10.9148	11.0286	10.7514	11.0141
Chka	8.01488	8.09816	8.6054	8.41425	9.25736	10.1339	9.54091	11.1958
Oaf	8.90694	8.30573	8.87169	8.78311	9.66647	10.025	9.64145	10.1541
Fam83h	9.73384	9.01547	9.41766	9.55438	10.7561	10.5097	10.3661	10.599
5430435G22Rik	6.8885	7.03166	6.41128	6.65089	8.21935	7.56957	7.76576	8.19272
Vat1	7.60578	6.77138	7.67484	7.8625	9.15861	8.4286	8.78786	9.79785
9130008F23Rik	4.77115	5.20832	5.10013	5.4026	6.52514	6.29888	6.00476	7.38761
Cyp2c37	4.52464	3.54539	4.5221	3.45999	2.63365	2.31207	2.51032	2.90973
E130304F04Rik	6.70048	5.65835	6.34096	6.80092	4.89387	5.2119	4.54605	5.27694
St8sia5	5.99713	4.90728	5.67842	5.04471	4.18617	3.94715	3.8242	4.32759
Fam13a	9.72874	9.45021	9.28296	9.86872	8.6325	7.96292	7.71863	8.7091
Slc8a2	5.57278	4.99464	5.17001	5.46923	3.93691	3.67581	3.83827	4.65623
Pi4k2a	11.222	10.7948	11.0888	11.5251	12.3437	12.4631	12.0716	12.25
Atp2b2	4.72436	5.12644	4.52072	4.92789	2.94921	3.67802	2.53216	4.0355
Prune	7.03522	5.79677	7.03376	7.24133	8.76789	7.86114	8.1775	9.1373
Olfr127	6.7438	7.35549	6.41233	6.51621	5.59953	5.51847	5.46982	5.66054
B230312A22Rik	4.46806	3.77481	5.07554	4.84706	6.19044	5.93567	5.7348	7.33752
Mcl1	11.2112	10.9192	11.1744	10.9967	12.1305	12.1736	11.8473	12.4695
Taar4	4.75222	5.16087	4.3239	4.65156	3.46441	3.56391	3.44444	3.81092
Tmem117	8.03616	8.10696	7.96775	8.23449	6.75434	7.29983	6.61357	7.18511
Cttnbp2	7.38182	6.94044	7.45139	7.89691	6.3466	6.16266	6.00795	6.3897
Tmem26	5.80081	5.43827	5.38285	6.11793	4.89539	4.52055	4.21819	3.99746
Mmp11	7.29766	5.37496	6.07549	6.79087	5.20855	3.9881	3.90622	4.72398
Ecel1	6.94025	6.10655	6.55	6.60155	5.64545	5.25762	5.0726	5.48578
Galr3	7.32652	6.90294	7.05605	7.22899	5.94144	6.24147	5.85405	6.22383
Ptpn12	7.42876	6.4247	7.3831	7.68145	8.73545	8.38215	8.42461	9.37771
D0H4S114	5.61328	3.29632	4.57978	4.98575	3.40154	2.40469	1.99161	2.40994
Osr1	4.81073	4.29273	4.38855	4.79897	3.40862	3.59883	3.04654	3.65042
BC052040	7.22097	6.92009	6.89995	7.3109	5.99735	6.09315	5.53321	6.2159
5830407P18Rik	4.60915	4.41238	4.73388	4.62517	5.27882	6.58983	5.69512	6.61831
Rhbdl1	7.52322	7.42188	7.51764	7.57923	6.36055	6.27343	6.20047	6.86748
P2rx5	7.06029	6.57061	6.51329	6.61294	7.97826	7.78908	7.69391	9.03636
Slc25a25	9.73845	10.0469	11.3905	10.2077	11.499	12.4166	11.7446	12.4566
Fam168a	6.79443	6.58188	6.46102	6.88094	4.98255	5.3433	4.88217	6.119
Ryr3	5.88209	5.02045	5.39124	5.56402	4.22199	4.23753	4.33411	4.50681
Zfp52	8.99053	8.33807	8.65783	9.02424	9.77931	10.0083	9.67488	10.5136
Zfp345	5.89063	4.17417	5.84589	5.96452	3.8213	3.31813	3.76569	4.01722
Gpha2	7.33922	6.7754	7.18378	7.37278	5.95041	6.10717	5.93647	6.30963
Slc28a3	5.67925	5.18068	5.05318	5.31004	4.10113	4.47501	3.978	4.24554
Eif2ak3	8.13568	7.38422	7.8164	8.3483	9.27928	8.94019	8.96359	9.75882
Myo1e	3.16239	3.38498	3.80324	3.98563	4.68858	5.11369	4.54983	5.88335
Snhg3	8.36784	8.2839	8.1534	8.25762	9.29462	9.31417	9.02634	9.74608
Banf2	5.17841	4.80474	4.67523	4.88765	3.61535	3.10803	3.60342	4.227
Pla2g5	9.24893	8.43099	8.92389	9.52783	7.55432	7.92195	7.62404	7.98901
Mitf	5.95141	5.85505	5.49108	6.00198	4.61909	4.74747	4.56305	3.18328
Olfr1270	4.9437	4.30026	4.23124	4.76228	2.79689	3.61723	2.0308	3.45007
Dusp10	1.83069	4.93358	3.05278	2.05843	5.22229	5.63767	5.05682	6.0563
Slmo1	6.69554	6.33301	6.36159	6.53524	5.2287	5.29929	5.28768	5.79391
1600029O15Rik	10.4977	10.352	10.2837	10.3728	9.07079	9.22339	8.95793	9.76552
Endou	5.95505	4.94458	4.84501	5.59608	6.56506	6.81081	6.35332	7.26713
Trpc2	4.2024	4.03168	4.13649	4.28657	3.00615	2.14937	2.27523	3.55077
Ltb	6.68761	6.01476	6.35709	6.3847	5.42256	4.84012	5.29153	5.36469
Sec24d	7.76022	7.32704	7.68568	8.07043	8.84616	8.87861	8.54809	9.3942
Kdelc1	7.00459	6.72931	6.88582	7.21367	5.91427	5.45594	5.57176	6.25541
Speer2	4.62341	4.30287	4.18645	4.21891	3.08325	3.19006	3.36592	3.49658
3830431G21Rik	8.12195	7.38669	7.93203	8.04628	6.46241	7.23063	6.33676	6.29021
Cdh5	6.48182	5.38591	6.60856	7.32492	8.39221	7.74165	7.88482	8.66974
Nrip1	8.85608	8.26472	8.36446	8.96839	9.67572	10.0467	9.45284	10.122
Hspa12b	6.64208	6.521	6.3349	6.63754	5.54565	4.51701	4.85691	5.79536
Gpihbp1	9.05	8.40171	9.006	8.89133	10.0679	9.8026	9.79051	10.0608
Fgf8	4.89103	4.8649	4.47208	4.50731	3.49846	3.43257	3.32813	3.99518
Cited4	6.94372	6.16497	7.19576	6.36877	7.67801	8.25537	7.73596	8.31412
Sdc1	6.77971	6.18841	6.24574	6.56872	8.07177	7.72867	7.16489	8.7775
Neurog3	5.63927	4.5107	4.76193	4.71954	3.624	3.69857	3.44421	3.826
Tlr2	5.36129	4.80569	4.66811	5.08745	7.13337	6.6847	5.57	6.46691
Jak2	7.88246	7.21488	7.58202	7.76205	8.81208	8.94673	8.38073	9.63143
Iffo1	8.52192	7.61922	8.31086	8.56294	6.79732	6.85753	6.60603	7.48683
Slfn2	6.01221	5.06553	5.80372	6.15898	8.07524	8.02277	6.38115	7.48218
Tm4sf1	10.0066	10.0071	9.68443	10.1659	11.2253	10.8916	11.1853	12.445
Klc1	8.66864	8.05732	8.56674	8.77109	9.77051	9.72072	9.38014	9.62067
Tmem107	8.84044	8.88569	8.66419	8.79024	7.72602	8.03072	7.55097	7.82025
Cd164l2	7.5032	6.79851	7.05392	6.98469	5.76152	6.00186	5.46652	6.313
2610030P05Rik	4.84794	5.05385	4.96	4.93575	4.26704	3.45572	3.56466	3.99796
Got1	11.6018	10.922	11.2639	11.457	12.3774	12.5576	12.1102	12.8679
Mtmr7	4.5864	3.78841	3.7731	4.57099	3.46313	2.67945	2.58791	2.45556
Ube2v2	5.44702	5.5765	5.4149	5.51766	4.26083	4.35091	3.8722	4.87225
Ssh1	7.57531	7.13498	7.42525	7.7504	8.43332	8.69371	8.30198	8.94826
Wnt6	6.32745	6.32274	6.00239	6.12692	4.90744	5.33777	4.81274	5.39528
Nrip2	5.26911	4.81285	5.05824	5.06793	3.97123	4.22886	3.87677	4.06057
Gm14207	6.36708	6.24762	5.99079	6.42916	4.96189	5.45289	4.8567	5.38108
Csrnp1	6.33488	5.74418	6.02137	6.15675	6.96743	8.23769	7.0104	8.5091
Ocln	7.9799	6.71765	7.57094	7.75499	8.90293	8.91844	8.51198	8.95298
Nlrc4	4.80731	4.46703	4.50364	4.5959	5.68712	6.00477	5.2153	6.23756
Tgfbr2	10.3037	9.97879	10.078	10.2617	11.2066	11.2045	10.9413	11.8507
Doc2a	5.11573	5.10943	4.33458	5.2572	3.59726	3.60997	3.84924	4.0101
St3gal1	5.88951	6.43785	5.83708	6.17273	7.41883	7.24468	6.79102	7.86234
9230110I02Rik	5.81046	4.96215	4.91646	5.99591	4.50889	3.21306	3.7032	4.08727
Agphd1	7.95204	7.66406	7.87914	8.3203	6.63579	7.1008	6.36606	7.04578
1700090G07Rik	5.03144	4.84263	4.84879	5.15858	3.77676	4.24451	3.9722	3.74685
G0s2	7.31074	8.21688	7.56603	8.23591	8.89403	9.28133	9.03107	10.3089
Ralgps2	7.58096	7.0528	7.39983	7.71881	8.57961	8.64217	8.27833	8.5367
2310009A05Rik	9.10362	9.40627	9.05534	9.24479	8.01531	8.47626	8.01292	8.18554
Atp13a3	6.33988	5.94326	6.27572	6.83355	7.4662	7.64353	7.34384	8.62601
Hcrt	5.26408	4.94753	5.06307	5.24267	4.03092	4.16177	3.97501	4.3433
Aldh1a1	7.52202	7.0627	6.42897	6.71575	8.90472	7.78495	8.07791	8.72967
Arhgef25	8.73854	8.27032	8.275	8.39696	7.59918	7.30038	7.08804	7.47007
Tmem82	9.18324	8.5663	9.06131	8.93029	9.8399	10.0961	9.83081	10.4244
Ybey	6.21344	5.93574	5.91661	6.16938	5.06786	5.0829	4.51846	5.23304
Tubb4b	9.08752	9.07205	9.61866	9.84772	10.6611	10.5487	10.3986	11.6122
Flnb	5.92651	5.47427	5.3601	5.51187	6.36161	7.10998	6.45953	7.07363
H6pd	11.2484	10.8287	11.2407	11.1284	12.3801	12.0412	11.8671	12.4835
A730081D07Rik	5.99543	5.27664	5.43834	5.34599	3.9469	4.879	3.96229	4.23096
Pigy	5.25369	5.26232	4.72839	5.37455	3.90883	3.29693	3.23527	4.55234
Tas1r1	4.79013	4.24602	4.55855	4.5048	2.86411	3.58392	3.35866	3.699
Tmem11	10.475	10.2099	10.2895	10.4248	11.198	11.6076	11.1455	11.5284
Esam	7.74219	7.46658	7.25362	7.71401	8.78956	8.5768	8.29561	9.31391
Olfr1350	6.59151	6.48123	6.94326	7.03524	5.69253	5.45416	5.64511	5.96714
Luc7l	8.18478	7.96229	8.14958	8.17341	9.10503	9.2646	8.87589	9.92722
Rapgef2	8.56416	7.89986	8.36294	8.67722	9.35902	9.72006	9.22809	9.86957
Drd3	4.14794	3.86583	3.97696	4.23848	2.9135	2.91365	3.20126	3.19328
Gucy1a3	6.6809	5.64813	6.33016	6.70672	5.21462	4.48989	4.96143	5.3558
Mum1l1	4.4153	3.70262	4.02055	4.78914	3.32531	2.61626	2.37801	3.15252
Tfap2e	10.5351	10.3435	10.0759	9.84499	9.19857	9.36041	9.00837	8.83033
Ly6g5c	6.15549	5.71935	5.75609	6.01429	4.86468	4.96111	4.64915	5.07304
Ap3m2	5.41988	4.95609	4.66596	5.08729	3.73642	3.45708	2.91705	4.39465
Sdc4	11.4158	10.9016	11.5031	11.7643	12.557	12.6711	12.1835	12.7764
Calcr	3.22545	3.79341	3.4634	3.65807	4.65008	4.63667	4.27852	4.82707
Ly6g6d	6.96555	6.83708	6.62208	6.99521	5.87325	5.59	5.69732	6.13436
Stra6	7.23273	4.91781	7.03273	6.31446	3.45971	4.55302	4.6551	4.63422
Bahcc1	7.70339	6.66653	7.24064	7.60017	6.45089	5.89033	5.74957	6.07847
Tbc1d1	8.16935	7.04773	8.08518	8.47202	9.2101	9.2899	9.09782	9.84858
Gm6310	4.59906	4.22826	4.44003	4.55784	3.63588	3.15989	3.30993	3.61565
Camk2d	6.40528	5.30913	6.26147	6.73461	7.76323	7.28905	7.31903	8.13893
Tuft1	9.71326	8.73589	9.58782	9.49909	10.3621	10.8647	10.3331	11.1194
Olfr1364	5.93468	5.09001	5.28999	5.50348	3.40712	4.82644	3.7933	4.13558
Bag2	8.516	8.07286	8.35294	8.56603	9.39303	9.30484	9.25241	9.91373
Ikbke	4.15254	3.99177	4.232	4.38577	2.96084	2.97034	2.61636	3.61729
Appl1	7.35719	7.07111	7.1449	7.43456	8.27472	8.26213	8.00093	8.54971
Slc27a3	5.11802	4.87949	5.16702	5.6627	3.88105	3.23263	3.66135	4.60087
Phldb1	9.15763	8.26579	8.80567	8.9461	9.9195	9.76412	9.86197	10.6743
Siglecg	4.38349	4.15074	4.43314	4.36035	3.30886	3.21934	3.14016	3.64941
Olfr523	4.88784	3.97652	4.55858	4.55441	3.08072	3.70515	3.05297	3.40461
Dusp19	5.69087	6.21229	5.69871	6.02624	4.39948	4.97394	4.55958	5.15504
Olfr847	3.70225	4.54148	4.40038	4.45103	3.08233	3.05373	2.72723	3.4794
Tnrc18	6.90919	7.00065	6.7706	6.93338	5.18166	6.02814	5.68352	6.1502
Xrcc3	5.27082	4.62781	5.06747	5.15734	3.82868	4.0271	3.53134	4.26027
Cpm	8.94725	7.95743	8.54655	8.55753	9.7129	9.71273	9.34569	9.89346
Erbb2ip	4.0125	2.72601	3.58678	3.57826	4.45105	5.23321	4.5717	5.6532
Olfr344	4.13075	3.83576	3.71814	3.57297	2.44118	2.54874	2.66056	3.17952
Kcnn2	6.29377	5.65381	5.38985	6.02935	4.87522	4.62101	3.93247	4.8109
Shb	7.14005	6.88251	7.4897	7.74888	8.49245	8.54164	8.31192	9.69078
Cdr2l	6.01087	5.65402	5.84587	6.31929	7.28972	7.26107	6.55245	7.45251
B930025P03Rik	4.86876	3.92842	4.16666	4.55607	3.12246	3.09904	3.24681	3.47258
Phc2	10.4299	9.92041	10.2321	10.5648	11.423	11.2808	11.0898	11.8472
Rrp7a	6.62339	6.07479	6.1926	6.44236	5.17964	5.18746	4.40737	5.59175
Olfr549	7.38533	6.6421	7.00247	7.17304	5.91734	5.98112	5.7995	6.22633
Rbmxl2	6.56562	5.62959	6.2796	6.23729	7.36202	7.71454	7.04711	7.27079
Nodal	6.21988	5.55049	6.01692	6.15761	4.87111	4.81614	4.64052	5.24143
Mc2r	6.60908	6.11144	6.16307	6.77544	5.30065	5.12268	5.16056	5.65446
Tubd1	7.10332	6.58104	6.76338	7.06138	5.90578	5.69031	5.1948	6.10418
4930441O14Rik	5.32274	3.84945	4.80598	5.04834	2.64677	3.74447	3.25461	3.38792
Lrrc58	6.46036	4.96242	6.68594	6.4675	7.71024	7.69473	7.38292	8.0136
Ifna12	5.04371	3.67191	3.69542	3.96803	3.1729	2.03887	2.10314	2.78154
Mdm2	5.78497	5.00167	6.3591	6.25155	7.43865	7.12366	6.85539	8.05252
Dyx1c1	6.89099	6.03741	6.33593	6.59289	4.89667	5.61138	4.62002	5.54749
Olfr1395	5.86193	5.15647	5.29743	5.59582	4.1419	4.30745	3.85157	4.81857
Per3	5.11954	3.97927	5.20556	3.75619	2.62974	3.10276	2.19985	3.44531
Chst10	4.46037	4.03155	4.33114	4.34442	2.90489	3.74081	2.87482	3.1229
Lrrc25	4.2076	3.22675	3.80931	3.94408	5.07395	5.39083	4.51635	5.1619
Stab2	7.84092	6.60293	7.64391	8.00047	5.96968	6.0704	6.0536	6.5256
Mosc1	5.9196	4.61562	4.94946	5.35644	6.54676	6.45711	6.35982	6.47024
A030011A13Rik	4.46335	4.84474	4.77009	5.10851	5.87976	6.10251	5.49443	6.67491
Slc25a30	9.15609	8.00974	9.09223	9.20322	10.5774	9.86923	9.99299	10.4347
A230072C01Rik	4.24778	3.90542	4.00714	4.73569	3.31565	2.12623	1.59955	3.23587
Zfp661	6.75477	5.96858	6.38144	6.60617	5.6838	4.70207	4.80506	5.44307
Lamc1	9.48105	8.81815	9.1281	9.47761	10.5396	10.1142	10.097	11.0026
Nostrin	5.1116	4.51465	5.15549	5.40459	6.1642	6.11627	6.01856	7.056
E2f6	8.59646	8.60721	8.55666	8.73005	7.77004	7.33936	7.3494	7.93691
4930502E18Rik	4.87276	4.53292	5.1898	4.79674	6.04327	6.32875	5.5331	5.93606
Stox2	6.56713	5.95544	6.07532	6.5117	5.3155	4.99828	4.93657	5.48774
Olfr17	4.00949	3.68355	4.08429	3.93664	2.90702	2.9943	2.36474	3.14797
Kcp	8.54749	8.16444	8.33355	8.48011	7.23379	7.3573	6.98908	7.73438
Hsd3b2	11.87	11.2409	11.7301	11.8649	10.5547	10.9125	10.3893	10.5933
Sf3b3	7.00421	7.19164	6.68244	6.96971	7.73639	8.43082	7.75978	8.43548
Nlrc3	4.529	4.3851	4.56755	4.82368	3.36498	3.4849	2.74166	3.92641
Cntrob	5.82102	4.63541	5.15391	5.35881	3.51047	4.08696	3.27856	4.44527
Sh3bgrl3	11.4821	10.7459	10.984	11.1087	12.2373	12.2507	11.9027	12.1082
Myh9	12.8637	12.1038	12.5412	12.6647	13.8639	13.5641	13.4578	13.5291
Lbx2	7.0118	6.63073	6.6417	6.87002	5.61928	5.92087	5.53049	6.0316
B230206F22Rik	5.93243	5.55107	5.25793	5.67604	4.341	4.45145	2.7954	4.51062
2810452K05Rik	4.99172	4.04174	4.38757	4.76721	5.97312	5.91592	5.51991	5.4555
Cd2ap	7.73335	7.28915	7.69383	8.00318	8.64159	8.5851	8.6618	9.02051
Omp	4.75617	4.49285	4.68575	4.62764	3.09897	3.40865	3.12755	4.18337
Tead1	9.97563	9.87098	9.61516	10.295	11.0568	10.8289	10.787	11.3121
Rhbdl3	6.10732	5.65	5.72353	5.95182	4.7983	4.66238	4.6961	5.19277
1700029F09Rik	6.23293	6.60293	6.5076	6.39195	7.37408	7.35996	7.26018	8.06045
Kbtbd2	4.7427	3.50675	5.13819	4.87538	5.76237	6.13059	5.83656	6.38599
D6Wsu163e	8.3968	8.21778	8.27755	8.6766	7.45982	7.23384	7.04178	7.68718
Tmem121	4.71616	4.3432	4.23394	4.71091	3.81844	3.23745	3.28284	3.46764
Sox19	5.2735	4.38645	4.84446	5.16638	4.04523	3.71331	3.43725	3.89722
Nr2f2	9.46573	9.08595	9.10238	9.29153	8.55143	8.3304	7.99759	7.93689
Zfp936	7.19096	5.68108	6.80841	7.0739	5.55761	4.95412	4.94978	5.49999
Rapgefl1	7.08585	5.23958	6.19432	6.38395	5.18134	4.18856	3.84612	4.87902
Krtap31-1	4.71512	4.09505	4.43228	4.84638	3.1625	3.57589	3.67806	3.34394
Lamb3	3.53708	3.48737	3.0645	3.54849	5.19182	4.66293	5.07129	7.67913
Stxbp5	7.0018	6.415	6.88943	7.19959	7.9224	8.02758	7.66949	8.58788
Btbd10	6.61416	6.29779	6.65617	6.54872	7.4012	7.7549	7.2884	8.35737
Pif1	7.3338	7.12093	7.40544	7.25817	6.08044	6.70273	6.13296	6.15154
Smox	6.99465	6.09807	7.00704	7.10636	8.17996	7.77549	7.87526	9.04635
Map3k13	4.27376	3.8906	4.02001	4.16452	4.83763	5.11812	5.05827	5.81895
Zfp329	4.93939	5.11616	5.04309	5.34438	3.81214	3.18652	3.19999	4.67823
Ppp1r14a	6.42163	5.45499	6.19176	6.22086	4.60995	4.57864	4.66024	5.44019
Il15	7.10906	6.80446	6.92673	7.02496	5.93201	5.92678	5.3287	6.30654
Thra	9.94347	9.03424	9.0851	10.1026	8.30501	8.60239	8.2027	7.91412
Pdlim2	9.5552	8.54877	9.17737	9.35878	10.358	9.96126	10.3703	10.6746
Cc2d2a	6.26364	5.22248	6.18593	6.33296	4.41484	4.59214	4.43919	5.27846
Zfp322a	7.92998	8.22378	7.66027	7.97846	6.98891	6.6441	6.71441	7.26887
Rasgef1b	7.35406	5.81511	6.48944	6.35556	8.04213	8.19905	7.43003	7.87347
Vmn1r216	5.47618	5.1307	4.89835	4.9878	3.93162	4.49026	4.03386	3.58164
Gm20117	6.62813	5.50628	5.97514	6.20932	7.89521	8.0006	6.54658	8.09156
Vipr1	5.46629	5.04957	5.79832	5.4469	4.33123	4.2675	4.08	4.74989
Fyn	5.00703	4.0495	4.62992	5.16507	6.08074	5.85852	5.60228	6.7585
Tiaf2	5.46748	5.03617	4.84962	5.10851	4.21533	3.81187	2.56332	4.02537
Engase	5.51437	4.48664	4.63274	5.07747	3.54799	3.38752	2.47761	4.19145
Morf4l2	11.042	11.1382	10.8873	11.2223	12.1077	12.0682	11.7247	12.3901
Fhdc1	5.49846	4.90245	5.36903	5.27061	6.15582	6.56911	5.97287	6.73291
Spo11	4.89555	5.01977	4.51585	4.83296	3.81283	3.82042	3.41938	4.09318
Stap1	5.18266	4.66719	4.78051	5.35736	4.03566	3.46417	3.70637	4.24939
Sit1	5.42339	4.79484	4.69876	5.05527	3.86808	4.03246	3.38408	4.17284
Hsd3b6	8.30373	7.72579	8.01386	8.0572	6.38807	6.60527	6.59602	7.57541
Acmsd	6.27336	5.71913	6.31722	7.11155	4.80696	5.01857	4.52904	5.55355
Il28ra	7.10723	6.47345	6.25946	6.8483	8.26776	7.74842	7.37055	8.10647
Fchsd1	8.55114	7.82244	8.17146	8.32391	7.16192	7.15134	6.87736	7.45565
Nphp4	5.59325	4.92412	5.2092	5.54435	4.16485	4.381	3.69472	4.51107
Ccdc142	5.3433	4.79423	4.98838	5.00531	3.98499	4.12818	3.46565	4.24884
Armcx5	6.75751	5.87904	6.52715	6.73977	7.62012	7.69362	7.24919	8.15688
Phyhip	5.63175	4.96144	5.73214	5.91756	4.52036	4.45923	3.90331	4.64319
5830469G19Rik	5.81738	5.57559	5.57614	6.01808	6.57811	6.78265	6.61131	7.42077
Nedd4l	8.19937	7.00467	8.35272	8.27775	9.29396	9.18797	9.08762	10.1674
Ifnz	6.34532	5.68393	5.78801	5.97184	4.78611	4.84089	4.64959	5.27417
Vav1	3.85828	3.39424	3.39072	3.5137	5.13919	4.51481	4.143	5.3889
Il1f8	5.22288	4.29559	5.19707	4.65518	3.87207	3.71503	3.4545	2.32277
Det1	7.68262	7.39947	7.24537	7.73469	6.59421	6.03153	6.09457	6.87204
Dpf1	4.96731	4.674	5.1814	5.05844	3.59883	4.23379	3.86526	4.08633
Tssk4	5.47873	4.5329	4.81977	5.15742	4.14939	3.16341	3.4124	4.10437
Kcnh2	4.4984	5.62817	4.27462	5.20368	2.82983	3.57248	3.70128	3.80311
Eif5	10.1268	9.4813	9.91665	10.3088	11.0666	10.9604	10.9159	12.0448
Slamf9	7.79364	6.80639	7.43331	7.68016	6.54309	6.3067	5.94275	6.3144
4833442J19Rik	6.64959	6.16948	6.50126	6.80023	5.35602	5.31806	4.88997	5.94153
Ralgps1	4.67229	4.10554	4.36967	4.74699	5.57347	5.4612	5.22305	5.85358
Hif1a	9.49773	8.51568	9.18077	9.36281	10.3728	10.21	9.9727	10.785
Hk2	5.17067	6.99931	2.86654	3.36255	8.51897	7.28994	6.67532	8.77012
1810029B16Rik	6.82327	7.01921	6.64939	6.92642	7.77278	7.74347	7.68692	8.50119
Plk2	7.25578	6.13766	6.53992	7.37754	8.28696	8.90574	7.63889	8.24377
Mfap2	7.21647	5.8259	6.45852	6.86621	5.36855	5.35774	5.36209	5.32828
Sybu	4.53642	4.3176	4.54979	4.62366	5.68202	5.41913	5.15579	6.1698
2200002D01Rik	8.92706	8.48828	8.55562	8.85905	9.88694	9.50138	9.49123	9.99122
Arvcf	7.46285	7.03257	7.56248	8.07396	5.98481	6.29618	5.97428	6.8953
BC051628	6.26104	5.18587	5.95697	5.58276	4.92386	4.26853	4.3455	4.67635
Stat1	8.29853	8.26687	8.23176	8.89091	7.84653	7.05908	6.24851	7.06401
Frem2	5.77211	4.53535	5.34724	5.58139	4.33247	4.19656	3.42483	4.02475
D19Ertd409e	6.65447	5.52934	6.45552	6.54903	7.60766	8.0943	7.33985	7.25713
Akr1b8	8.56537	8.7344	8.32252	8.40832	10.1804	9.41219	9.12797	10.4304
Cdh15	4.00969	3.5712	3.62748	3.42884	2.19057	2.35104	2.78056	2.9718
Magel2	4.15823	3.70533	4.02599	4.19689	2.67634	3.42003	2.55103	3.0573
Serpinb3c	5.75784	4.95202	5.2943	5.49562	4.07392	4.34824	3.9903	4.67902
Trafd1	8.1441	7.78801	8.13173	8.16314	9.32457	9.28583	8.53303	9.607
Tiam2	6.5687	7.77447	6.59771	7.16095	8.38347	8.12695	8.01179	8.71563
Tat	4.84863	6.35338	6.22172	6.35134	4.76493	4.75113	4.07077	4.36259
Tacr1	5.16756	4.34891	4.69108	5.03959	3.44275	3.91361	3.80463	3.80969
Klf13	8.23838	7.41693	8.32222	7.83636	9.02033	9.2092	8.74722	9.77159
Art4	6.44535	5.25231	6.32531	6.24499	5.01497	4.54439	3.6806	5.0437
Ttc39c	10.1012	10.2045	9.97981	9.80191	10.9084	11.1972	10.6747	11.3436
Ssbp1	5.03304	5.68708	5.08441	5.19972	3.94274	4.00744	3.39239	4.6915
Atrnl1	4.65209	3.73158	4.55997	4.93968	5.68021	5.86706	5.29285	6.52708
Hoxc6	8.73124	7.61005	8.52594	8.81703	7.62506	7.0485	7.01797	6.88625
Olfr569	5.27937	4.66242	5.304	4.95467	3.94823	4.18468	3.8813	4.16729
Sval2	3.99885	3.40007	3.50985	3.53514	2.74549	2.86023	2.42872	2.28745
Tcl1	5.87545	5.45558	5.62826	5.6858	4.82207	4.6348	4.22058	4.91485
Ppp2r2a	9.39409	8.66768	9.07473	9.32889	10.0763	10.2601	9.90044	10.8096
Vmn1r192	5.28728	4.88845	5.08715	5.28046	4.18888	3.58288	4.17534	4.40528
Midn	9.76504	10.0207	9.73178	9.51409	10.532	11.4267	10.4632	11.4329
Asap3	5.37816	4.45304	4.9618	5.07985	3.16651	3.64307	3.01182	4.47039
Stk36	5.499	4.14481	5.10906	5.38477	3.86422	3.64569	3.55173	3.98932
Rab11fip3	13.1319	12.3233	12.9324	13.3327	12.0278	11.9648	11.5528	11.7
Zc3h8	3.61638	4.26864	3.33915	3.23208	2.33591	2.27667	2.34078	2.85321
Maf	8.10487	6.18638	8.2159	8.60938	6.35721	5.42228	5.89989	5.99482
Sh3bp2	6.33244	4.96919	6.71835	5.51839	7.29772	7.24984	7.28849	8.69437
Myof	8.64972	8.40924	8.06934	8.64167	9.86844	9.25936	9.1967	10.2931
Adora2b	4.58687	4.78477	4.75514	5.10353	5.78654	5.98068	5.45155	6.55667
4930511I11Rik	4.31506	3.38951	3.92063	4.01477	5.42506	4.83156	4.91034	4.88631
Hist1h1c	11.4901	10.8311	10.9337	11.5137	12.1937	12.4371	11.935	12.5138
Gpr113	6.68037	5.9489	6.32153	6.54379	5.15889	5.50335	5.33452	5.46774
Ccdc135	4.85564	4.43596	4.73584	4.95173	3.90044	2.79035	3.6308	3.89473
Cdh1	10.8296	10.3967	10.6308	10.9574	11.6072	11.8778	11.3813	12.1047
Vmn1r-ps103	4.34708	3.82709	3.84708	3.82053	3.34266	2.81994	2.7401	2.85651
Rorc	9.25137	8.13879	9.05728	8.64183	10.0847	9.84895	9.66354	10.1297
C730045O03Rik	5.22862	6.46245	5.23519	5.20915	4.29034	4.53704	4.20036	4.00381
Hrasls	4.25478	3.54916	4.18525	4.91233	2.62299	3.2046	1.70124	3.19009
Fbxo34	7.97156	7.03997	7.68332	7.96566	8.77608	8.77748	8.49289	9.35956
Ppp4r2	9.58771	9.43858	9.63361	9.82513	10.6571	10.5273	10.2781	11.092
Fjx1	4.50621	3.93628	3.81172	4.03206	5.22336	4.93137	5.01194	6.17883
Clip3	5.33989	3.47552	4.42441	4.85747	3.67365	2.77258	2.12077	2.80234
Kitl	6.23765	6.12906	6.17791	6.38665	7.2041	7.09891	7.08323	8.19712
Hspa1l	5.13047	4.76146	4.87567	4.89649	3.87585	4.1438	3.12448	4.07572
5330439M10Rik	4.96223	5.9892	4.31401	5.56897	3.82881	3.75532	3.60044	4.12172
Ccdc151	6.31495	6.08429	6.12955	7.02936	4.72833	5.36158	4.81756	5.68346
Clec2g	5.78069	4.7994	5.31266	5.57445	4.30652	4.41844	4.02171	4.39149
Ccr6	5.28294	4.77646	4.79543	4.78062	3.47919	4.24834	2.28639	3.65683
Ccdc86	8.27391	7.77766	8.0948	8.26944	9.08107	9.01041	8.89256	9.81153
Ptrf	7.85529	7.47478	7.625	7.93143	9.38776	8.4443	8.5746	10.0165
2700049A03Rik	7.83836	7.20887	7.40652	7.5548	6.80813	6.39089	5.82925	6.55173
Tmem218	8.4061	8.02551	7.78641	8.46202	6.88733	7.15511	6.61702	7.53775
Gdf10	5.6769	5.24889	5.58852	6.10408	4.29444	4.18628	4.29895	5.13911
Ncbp2	7.15598	7.28021	7.09537	7.49145	5.83562	5.77012	5.62818	6.90557
Lmcd1	8.04189	7.41883	7.64209	8.33206	8.84484	8.85937	8.78308	9.45706
Csf2rb2	6.22179	5.23041	5.01126	5.27171	7.27496	6.85605	6.00692	7.35129
Cbx8	6.79991	5.86467	6.35358	6.616	5.33641	5.67018	5.07103	5.16874
Ly6g6c	4.93293	4.57941	4.60361	4.71914	3.2045	4.19207	3.40905	3.72835
Napepld	6.36061	4.74134	5.39256	5.99402	4.26052	3.60811	3.43922	4.81948
Gpr162	8.34814	7.71625	7.9191	8.03677	6.92013	7.43369	6.77154	6.74181
Tfe3	6.76319	6.04095	7.10682	7.2292	8.12236	7.80896	7.74173	8.86221
Chic2	7.4146	6.87878	7.44004	7.50543	8.3517	8.23382	8.07342	8.97822
Tuba-rs1	9.08349	8.57579	9.05202	9.36047	9.98009	10.0537	9.86846	10.9483
Pxk	10.2058	9.69546	9.85126	10.1278	11.0792	10.9826	10.5787	11.2453
Olfr920	3.34494	2.98693	3.17292	3.6436	4.2807	4.59591	3.92271	5.2244
B3galnt1	6.25409	4.98637	6.5382	6.95451	4.15699	4.32083	4.27861	5.34746
Olfr975	5.54086	4.89279	5.1467	5.49317	3.57254	4.39545	4.16173	4.4818
Tmem43	8.90437	8.74119	8.60826	8.89381	10.2374	9.38085	9.59885	10.1358
Mphosph6	7.8221	8.12045	7.59715	7.77314	8.62944	8.93782	8.59046	9.54446
Rora	7.76545	7.15625	8.10542	7.90556	8.7936	8.7512	8.71385	9.90847
Lsm11	3.77616	3.84061	4.22985	4.35397	5.34044	4.71214	5.04538	6.07125
Ryr1	7.01003	5.93443	6.87217	6.59014	5.22725	4.94271	5.03486	6.04159
Car7	8.51541	8.14882	8.53126	8.6646	7.53654	7.3407	7.06545	7.84803
Ptpn1	11.022	10.3275	10.8485	10.7351	11.7681	12.0282	11.3665	11.8738
Spin2	4.58715	4.09046	3.66356	4.58792	3.01981	3.29793	3.27559	2.15059
1190002F15Rik	4.85221	3.83734	4.07901	4.1186	2.95877	2.98905	2.87938	3.53766
Poli	8.64915	7.63333	8.19747	8.3649	7.44449	7.01647	6.83376	7.15386
Fam53b	4.98418	4.53715	5.04091	5.02613	3.66274	3.50777	2.98856	4.45182
Syt10	6.77787	8.48509	6.31367	7.40322	5.44126	5.94957	5.64967	5.58886
Klhl6	5.49909	4.76861	5.0153	5.30503	6.48002	6.10325	5.82916	7.1351
Gm14308	9.38344	8.01339	9.03565	9.33654	7.7951	7.38402	7.46564	7.97712
LOC100503728	5.13634	4.54207	4.20592	5.1478	5.81434	6.21362	5.61644	5.8645
Il22ra1	4.93667	4.89439	4.91285	4.88036	4.12128	3.28519	3.82409	4.24975
Srsf5	8.63536	8.62359	8.69769	9.0173	9.60523	10.0327	9.40058	10.7006
Clic4	10.7383	10.336	10.738	11.1508	11.549	11.8421	11.6514	12.6094
Sstr3	3.82988	4.08047	3.63298	3.90494	3.0871	2.59454	2.39119	3.21682
Olfr1026	5.00157	4.22327	4.74321	4.74737	3.45091	3.72549	3.1812	4.02492
Gata1	4.14228	3.6872	3.8074	3.90328	3.06284	2.40599	2.22562	3.29676
Tcerg1	6.65538	5.48878	6.70515	6.85216	7.83295	7.4565	7.45742	8.28574
Cys1	10.9423	10.5028	10.9955	10.5371	9.59172	10.1447	9.48535	9.74467
Zfp229	5.50359	4.54274	4.95611	5.72113	4.56796	3.12546	3.53254	3.87958
6030458C11Rik	7.59481	6.90574	7.37182	7.32135	6.55365	6.02318	6.06904	6.50655
Zmym1	6.71667	6.57107	6.57752	6.58989	6.08919	4.79654	5.09678	5.754
Prnp	11.7258	11.0347	11.6919	11.2058	12.346	12.4574	12.1915	12.7913
Emd	8.98642	8.37787	8.64396	8.87676	9.45538	9.96326	9.48354	10.2945
Emx1	7.83428	7.80986	8.32099	8.23187	7.19858	6.7861	6.44486	7.40058
Hdac11	6.57567	6.28263	6.49167	6.56175	5.09136	5.18666	4.8273	6.13469
9.13e+15	4.63035	3.53666	4.51993	4.96298	3.373	2.7568	3.3538	3.14613
Zfp708	5.63332	5.10399	5.02354	5.41829	4.32679	3.4395	3.83632	4.73699
Snora3	4.98199	4.48407	5.02731	5.28717	5.64849	6.25319	5.85154	6.86898
Rab11fip1	6.96398	6.03741	6.54825	6.67728	7.57465	7.81405	7.22317	7.97958
Ggn	5.64002	4.69024	5.07134	5.01135	4.12862	4.04599	3.85171	4.27578
Gm20033	6.8474	5.52053	5.89851	6.52265	7.65132	7.56378	7.0634	7.41962
Nlrx1	4.7097	3.91853	4.55912	4.85136	3.30929	2.97853	2.50854	3.97315
4931431F19Rik	4.19946	4.30245	3.54381	4.02688	2.29577	3.24298	1.94279	3.27368
Prkcdbp	8.75776	8.07996	8.0773	8.7344	9.86059	8.95928	9.54031	9.93843
Ptbp2	8.08447	7.16991	7.64442	8.28805	8.78118	9.09091	8.64873	9.2
B930096F20Rik	4.6754	3.78016	4.1523	4.42176	3.18344	3.0184	2.99021	3.60506
Gdap1l1	6.35967	5.92382	5.35655	5.7486	4.64027	4.56516	4.61392	5.21073
Rgs3	7.36391	6.82408	6.92019	7.26173	6.53125	5.44024	5.68786	6.20231
Polr3d	7.70639	7.16312	8.24206	7.78236	8.55391	9.06534	8.57483	9.54925
Hs6st3	4.80488	5.59791	4.86663	5.04688	3.9135	4.23155	3.89601	4.26355
Ptk2b	9.34274	8.32618	9.35709	9.51491	10.2656	10.2149	10.0543	10.8417
Olfr1393	4.88047	4.67192	4.59689	5.11598	3.65603	4.0732	3.30685	4.11115
Sowahb	8.21939	7.62782	7.6313	8.55598	8.81348	9.30995	8.91958	9.76413
Scarb2	7.81252	7.53493	7.40851	7.84075	8.66935	8.4784	8.35311	9.32481
Nwd1	4.75572	4.47325	4.16051	4.25201	3.20042	2.90698	3.15755	3.97341
Dnmt3a	5.21865	4.08117	4.99366	5.37017	5.94727	6.34143	5.78948	6.49733
Gvin1	6.46169	6.36764	6.2278	6.7866	8.23408	7.60196	6.84103	8.17103
2700008E08Rik	4.06555	4.04838	3.17633	3.65978	2.33641	2.86895	1.89491	2.98375
Cyp2d10	11.4198	10.4461	11.1675	11.6747	9.59669	10.1963	10.0241	10.2253
Capn2	9.36932	8.41074	9.05304	9.40823	10.4774	9.88426	9.9527	11.1186
Ripply3	6.68238	6.04329	6.51759	6.8104	5.75679	5.35848	5.13982	5.6981
Ehd4	10.3298	9.95835	9.72973	10.2677	11.3855	10.9801	10.6397	11.5802
Olfr609	5.96323	5.4866	5.45518	5.72805	4.89086	4.83691	3.95293	4.687
Arnt	4.93621	4.02017	4.68156	5.38824	6.10734	5.98307	5.57937	6.07803
Prkcc	5.99411	6.71488	7.41145	7.55475	5.34251	5.90871	5.47331	5.67352
Osm	4.58252	4.22818	3.88567	4.3775	3.2887	3.69245	2.90839	3.09717
Ugdh	11.26	10.4988	10.9505	11.3907	12.2356	11.8298	11.8464	12.6634
Dleu7	8.62305	8.69882	8.87593	9.60181	7.7733	7.72381	7.73478	8.25219
Raver2	5.70067	5.95807	5.03669	4.86435	3.97737	4.36104	4.10293	4.55573
Il33	7.25769	6.6008	7.06087	6.723	8.6482	7.63138	7.60096	8.59535
Lilrb3	7.19477	7.1676	6.94478	6.90401	9.07865	8.46378	7.60393	7.92892
Plp1	5.15203	4.20586	4.09395	4.69774	2.88721	2.99615	2.73194	4.11861
Cyp17a1	9.21091	7.93584	9.10871	8.8185	7.45479	7.58046	7.50062	7.8877
Ptchd1	4.9969	4.67323	4.68351	4.64505	3.44658	3.38181	3.46651	4.40499
Fmn2	5.0877	4.71039	4.28149	5.17665	3.58114	3.84666	3.57033	4.09013
Bbs12	5.02376	4.31547	4.45607	4.88212	2.91258	3.58203	2.34879	4.16721
Zfp606	4.75482	3.72878	4.77355	5.20368	3.81289	3.27094	3.38234	2.85621
Sec16b	5.77397	4.74531	5.2533	6.01271	6.88782	6.70267	6.19359	6.7433
Nfkbib	9.80807	8.73666	9.49461	9.70244	10.4923	10.4745	10.3371	10.6774
Hdac4	7.86886	7.04479	7.66392	7.80557	8.596	8.78045	8.25052	8.85934
Ninl	8.26577	7.52372	8.17476	8.35461	7.51415	7.10213	6.63582	6.41576
S100a11	10.982	10.1074	10.5579	10.8349	11.6808	11.5817	11.3372	12.0991
Ranbp3l	9.17252	8.41394	8.4271	9.18138	7.61411	7.97963	7.05812	7.93269
Ncapd2	8.31339	7.33667	7.88779	8.12181	6.88347	7.00292	6.5571	7.06662
Klf17	5.3532	4.98584	5.07777	5.4914	4.29986	3.65316	4.36513	4.5348
Accn1	4.88322	2.73562	3.28079	3.9634	5.62544	5.10394	4.82334	5.57401
Gm5101	4.93655	3.63961	4.37248	5.18833	3.37999	2.8045	3.07334	3.62431
Rspo1	3.5175	3.752	3.67496	3.87429	1.92761	2.5112	1.85466	3.41991
Mybl2	6.23623	5.24173	5.82804	5.76275	5.07888	4.6071	4.34536	4.79575
Hspa1a	9.26202	10.0719	9.09883	9.18923	10.3844	11.0003	10.048	11.5284
2700050L05Rik	6.66843	6.1668	6.79356	6.56453	7.30845	7.76369	7.22419	8.24607
Podnl1	4.41639	4.14967	3.95465	3.93168	2.89786	3.65403	2.5723	3.10688
Lrrn3	3.89411	3.69432	3.34774	3.62516	5.17117	4.00796	4.83498	5.76434
Dna2	6.31449	5.61677	6.14554	6.49651	5.44015	4.84825	5.03887	5.20047
Mlh3	6.46018	5.64189	6.32402	6.60858	5.17033	4.92174	4.83905	5.67193
Riok3	7.90474	6.7575	7.73788	8.11714	8.82007	8.68711	8.60924	9.74081
Rpa3	6.81351	7.12763	6.70234	6.86765	5.68053	5.768	5.11745	6.46648
Olfr706	4.19339	3.61002	3.69904	3.85663	2.46056	2.64959	2.58502	3.43567
Socs4	4.79696	4.70445	5.20262	5.21269	5.72124	6.12963	5.72894	6.83494
Gja1	3.27829	4.52471	3.81989	2.89051	5.42054	4.89434	4.45628	5.17103
5730409E04Rik	7.29597	7.2467	7.09828	7.60092	6.25314	6.16825	5.9459	6.86361
Pola1	5.43935	5.63967	5.00141	5.52435	4.17087	4.56906	3.79625	4.80192
Rbbp6	5.95563	5.57164	5.62791	6.0157	5.00628	3.8777	3.8061	5.23682
Mbnl2	8.29306	7.26461	8.27707	8.36326	9.34236	8.99458	8.87126	9.87677
Ywhag	9.33294	8.88751	9.60243	9.7303	10.6457	10.1311	10.1581	10.8739
Dnajc5g	3.96058	3.80556	3.61389	4.23654	2.9208	2.30939	3.38983	2.76245
Coq10b	8.17394	7.02042	8.52348	7.32843	8.72189	9.30226	8.80974	9.73538
C230075M21Rik	5.39173	3.80294	4.84441	4.98117	5.85593	6.12316	5.72406	6.35463
Akr1c18	9.87523	8.64361	9.28798	8.94274	8.27447	7.98677	7.16582	8.25042
Ptger4	5.31855	4.2435	5.02381	5.47411	6.23772	5.95999	5.93114	7.00638
Traf3ip1	7.09134	6.73131	7.15883	7.34393	6.21547	5.69982	5.78348	6.55099
Stambpl1	4.15405	3.58427	3.04105	3.92517	4.5259	4.89873	4.73096	4.73958
Exoc3l2	9.24606	8.85976	9.05122	9.49114	8.32893	6.72976	7.76921	8.42113
Bmp2	1.94221	1.95866	2.35448	2.75942	3.49462	3.03701	3.10186	4.3628
Sgms2	9.59184	8.62596	9.85605	9.9606	10.5861	10.7356	10.3981	11.1823
Baat	5.19064	4.39681	4.94553	5.26263	3.73425	3.62113	3.56378	4.4673
Parp11	7.30691	6.71242	7.20608	7.56483	6.68987	6.00451	5.58554	6.08982
Moap1	7.45687	6.89	7.25258	7.49348	8.08898	8.16532	8.03698	8.85538
Aqp2	10.8654	9.9999	10.9069	10.7593	11.9796	11.8179	11.2112	12.9293
Mtap7d1	8.9224	8.51603	8.90367	9.08866	9.91945	9.62127	9.58533	10.7153
Cdca4	5.96162	5.18205	5.88285	6.16343	6.70997	6.99392	6.65166	8.09428
Fam160a2	9.43479	8.83085	9.21973	9.40078	10.1073	10.1371	9.90985	10.832
Smad3	3.90313	2.90142	4.11567	3.97486	5.06144	4.57061	4.79278	6.16062
Ddc	10.8632	10.6675	10.4276	11.761	9.61574	9.56224	9.46108	10.2663
Rbl1	7.13682	6.21953	6.50311	6.90105	5.7197	5.8384	5.26082	5.83765
Pdp1	6.06607	4.73267	5.35337	5.73595	6.97116	6.42387	6.30505	7.72268
Mnt	10.0417	9.26187	9.76626	9.88267	10.4009	11.0238	10.5275	11.0388
Adamts10	5.28413	4.24649	5.50164	5.64836	3.88373	3.14398	3.20539	4.61019
9630023C09Rik	6.54743	5.93091	5.93896	6.57024	5.58405	4.92098	4.84384	5.45346
Tmem206	9.12697	8.26657	8.62552	9.13433	7.56994	8.11207	7.35104	7.8706
Cdc42ep4	7.17553	6.61529	7.44505	7.24679	8.32084	8.0066	7.88479	9.36472
Smc2	5.04437	3.51399	4.43773	4.8779	3.11099	2.98454	2.19065	3.74968
AI837181	8.44568	7.58384	8.41979	8.47698	9.02423	9.1446	9.2454	9.78653
Slc16a1	8.36055	9.41167	8.61946	10.2514	10.7841	10.3352	10.4192	10.685
LOC545261	4.63917	4.53734	4.67993	5.34388	3.14292	2.44066	3.01139	4.58226
Ccdc82	4.43379	4.25497	4.47905	4.27929	5.20604	5.5597	4.87046	6.21687
Pou3f1	2.92962	3.00658	2.4945	2.3785	4.03386	4.10551	3.19825	3.64534
Neurl1b	10.0188	9.18542	9.57366	9.78759	9.08584	8.09806	8.1025	8.79059
Ldb2	6.35719	4.94539	6.15107	6.62276	4.9126	4.74348	4.34124	4.90784
Hnf4g	5.24476	4.54083	4.86708	5.09767	3.73183	3.59974	3.29344	4.57832
F2r	9.81788	9.0517	9.58723	9.92222	10.9868	10.2802	10.3546	11.0993
Chpf2	8.72716	8.15661	8.38088	8.73717	9.61984	9.15392	9.25041	10.0724
Xdh	8.26811	7.34634	8.2081	8.33079	9.84946	8.79597	8.78679	9.59642
Bach1	5.0548	5.38683	4.99496	5.15298	5.42244	7.00542	6.40303	6.50146
Dusp11	4.97816	5.361	5.71426	5.95249	4.64772	3.76073	3.8115	4.9073
A830021M18Rik	6.33357	4.8745	6.38976	5.68721	7.76744	7.19005	6.83016	6.82951
Ncs1	6.09461	5.57859	6.39037	6.0668	6.81774	6.99944	6.83631	7.80537
Serpina3j	4.74687	4.49094	4.30899	4.25144	4.06228	2.7868	2.5072	3.50308
Gprc5d	6.53142	4.72112	5.98507	5.53121	4.36593	4.05076	3.8011	4.92274
Bcl6b	5.80295	5.14531	5.74517	5.78034	6.8368	6.14109	6.86912	8.08135
Ino80	8.60103	7.71509	8.43367	8.48263	9.32656	9.35207	8.93826	9.71297
Gimap1	7.64915	7.27614	7.57433	7.8215	6.72929	6.03234	6.34939	7.10056
Ppapdc3	6.19434	5.27015	5.61823	5.62348	4.77796	3.62937	4.2188	5.10082
Gm4862	5.77556	6.60918	5.37215	5.62777	4.16579	4.07652	4.08882	5.52331
Fermt2	9.92991	9.55554	9.75756	9.99696	10.7539	10.6958	10.4164	11.6318
Gm12588	8.79702	7.51613	8.59621	8.8358	7.40259	7.02586	7.01376	7.59405
F2rl1	5.35416	3.97086	5.40456	5.51684	6.16708	6.45892	6.00601	7.20394
Igsf5	9.60996	9.43169	9.43102	9.61744	10.1479	10.6285	10.1658	11.1773
Rtbdn	5.59882	6.36022	5.29253	5.40818	4.8374	4.80163	4.46214	4.44194
Tsr1	6.40321	6.12287	6.3857	6.78186	7.47168	7.14245	7.28697	8.59508
Igfbp5	5.45681	4.91395	5.21427	5.44462	3.92142	3.89119	2.88954	4.91882
Itih4	4.34188	6.44082	5.89911	5.72654	4.23637	4.21784	3.90996	4.41927
Myom3	5.86662	5.75671	5.38083	5.97001	4.45458	5.31498	4.33065	4.81462
Dcaf10	6.17924	5.51978	6.00484	6.29346	6.98628	6.95078	6.60031	7.55061
Plscr1	9.93911	9.65656	9.78292	10.14	10.4758	11.2461	10.5127	11.4858
Smarce1	6.5381	6.45897	6.43119	6.5857	7.21202	7.44273	7.1869	8.32756
Cyth1	4.7132	2.92969	5.01369	4.53606	6.30527	5.52387	5.35666	7.37345
Zfp697	4.107	3.18292	3.95811	4.19229	5.12545	4.79433	4.56323	5.07548
5430407P10Rik	7.47436	6.20637	6.59928	7.05766	8.32746	7.88835	7.44786	8.47633
Adm2	3.37712	2.14427	3.11741	3.35377	4.10735	3.96883	4.06672	5.4778
Gm4371	7.00662	6.63358	6.71846	6.9543	5.68019	5.51533	5.41691	6.54518
Glis3	3.23982	2.83793	3.82953	4.0104	4.55588	4.64085	4.18087	5.30565
Stxbp4	6.9653	5.47557	6.44783	6.46263	4.81713	5.57811	4.52095	5.37183
Lrrfip1	8.12502	7.55663	7.7579	8.12823	8.55121	8.80887	8.73683	9.5807
Kifc1	4.34082	3.53129	3.74387	4.0814	2.2952	2.88866	2.4366	3.52721
Sdccag8	6.36965	5.51656	6.09591	6.19157	5.00772	5.01398	4.65102	5.49485
Cnr2	3.77015	2.98595	3.60808	4.61557	3.02351	1.85021	2.13068	2.6715
Ddx3y	8.31224	7.2271	8.18529	8.05434	8.98879	9.07586	8.5909	9.49354
Wdr43	7.86337	7.09927	7.68295	7.88166	8.7227	8.39457	8.32915	9.27296
Car5a	5.26783	4.5275	4.36287	4.98893	3.62489	3.36229	3.49097	4.34681
Ate1	5.79761	4.52951	5.35163	5.6236	6.32048	6.21562	6.34569	7.29213
Ptar1	5.75134	4.81774	5.55137	5.98615	6.43541	6.58248	6.39919	6.74748
Zpbp2	5.36473	5.187	4.61773	4.9296	4.5533	3.67613	3.58844	4.14532
B930069K15Rik	5.32019	4.81155	4.8874	5.46635	5.97752	6.09699	5.73672	6.69455
Diras1	3.62656	2.94465	3.38225	3.74232	5.5795	4.40306	4.33098	4.17552
C130039O16Rik	4.76116	4.36662	4.51848	4.68831	5.04034	6.22251	5.30542	6.43627
B4galt1	10.2642	9.13731	10.2436	9.99721	11.0418	10.9568	10.6292	11.2768
Ctnnal1	6.61033	5.25419	5.92449	6.47532	7.36019	7.10348	6.84495	8.1976
Cyp2a22	7.89857	7.31769	7.00396	7.37986	8.52434	7.90862	8.45765	9.3335
Arhgef3	8.29623	7.41516	7.92874	8.32851	8.84681	8.91548	8.78026	9.42837
Tsga14	4.68268	3.77869	4.24604	4.83217	3.73358	3.2118	2.64796	3.44882
Aoc2	4.2274	3.94105	4.60093	4.53666	5.19015	5.39735	4.94082	6.32876
Nfam1	3.45541	3.19662	3.65999	4.35489	3.07278	2.15759	2.12345	2.75498
Adss	8.98964	7.78099	8.86076	9.09468	9.71612	9.78792	9.52338	10.2887
Clec1b	3.20592	3.44171	2.81124	3.03898	4.18387	3.50047	4.24195	4.58049
Col11a1	4.59269	3.65978	4.16085	4.36811	3.00697	3.28912	2.67829	3.64623
Sprr1a	6.25468	7.80747	4.14095	6.1305	9.65961	7.49001	7.60336	9.8031
1600002H07Rik	5.76388	4.91923	5.49112	5.70011	4.43724	4.40101	4.05046	4.95348
Cbr3	6.70875	7.02581	6.34002	6.84506	8.35093	7.0784	7.66765	8.45006
Zfp532	5.10321	4.48802	5.14322	5.36525	3.80921	3.56581	3.3742	4.72189
Mylip	10.3338	9.4775	9.64629	9.83814	9.31292	8.67657	7.98999	8.85124
D14Ertd449e	11.5584	11.9823	11.5454	13.0447	10.5687	10.6802	10.5579	11.3446
Rnh1	10.1295	9.79028	10.0287	10.2722	10.9224	10.8286	10.7502	11.9539
Col4a1	10.2563	9.32576	9.99372	10.6921	11.3235	10.8377	10.9709	11.9658
Elf4	6.54188	7.32429	6.15069	6.30995	5.64908	5.64391	5.22928	5.69636
Fgd2	6.58731	5.74202	6.08127	6.21861	5.22011	4.76005	4.92768	5.6968
Krtap16-10	4.73903	4.68772	4.62498	5.25749	3.78304	3.3363	3.46128	4.50474
Adrbk1	8.79937	8.06048	8.92299	9.00975	9.68405	9.63666	9.35823	10.1588
Hsd17b2	8.12357	7.38319	7.43738	7.94245	9.25602	8.1413	8.63682	9.55362
Thbs1	4.50841	2.96597	4.96255	4.793	6.29325	5.13759	5.56078	6.9601
Ankrd2	4.26747	3.65139	3.68645	4.07093	5.23833	4.388	4.71453	5.40951
Cetn1	5.25861	5.92256	6.11683	6.35414	4.81085	4.93643	4.46748	5.29268
Efna1	8.14222	6.95987	7.66578	8.41134	8.76421	9.03763	8.61249	9.63166
Ubqln1	7.1885	6.99793	7.42614	7.9972	8.34279	8.3	8.12433	9.12532
1810034E14Rik	6.77802	6.00593	6.32397	6.8256	5.09571	5.76746	4.89022	5.88075
Tmem56	3.31199	4.59693	4.08481	4.75325	5.36208	5.30282	4.9596	6.11557
Ppbp	3.97361	4.7612	3.79352	3.58214	5.12264	5.06643	4.67383	5.83268
9430013L17Rik	5.60217	5.00174	5.14611	4.96171	4.38582	3.10468	3.75775	4.67831
Pinx1	10.0796	8.76126	9.6763	9.27892	8.13356	8.56964	8.44971	8.45967
Rad1	6.5571	6.28472	6.63362	6.91629	5.7376	4.9494	5.06123	6.23977
Sec62	6.51441	5.89449	6.64799	6.74175	5.29755	5.40516	5.03885	6.00166
Zfp36	9.26629	7.48267	10.4019	10.0958	10.8021	11.7049	10.7051	11.5517
Rfx1	4.86499	4.06126	4.49122	4.63817	3.85991	2.73102	3.3142	3.84165
Ccnyl1	6.28513	5.4343	6.44665	6.53511	7.36474	6.97513	6.93048	7.95169
Usp27x	6.40879	5.40162	6.04316	5.81246	4.83636	4.99901	4.33509	5.33057
Myoz1	3.9294	3.39526	3.61959	3.14323	2.57063	2.45153	1.95867	3.05123
Plekhg1	6.87486	5.96869	6.44631	6.93153	7.53549	7.58088	7.17749	8.3529
Pstpip1	3.99151	3.95384	3.88702	3.98735	5.22248	5.43656	4.13957	5.13425
Kdm6b	8.90596	7.88726	8.96774	8.82571	9.39896	10.1493	9.33485	10.6005
Asap1	7.61477	6.70385	7.47678	7.77376	8.42497	8.21128	8.15252	8.97812
E130118H10Rik	4.72032	2.65661	4.22286	4.78237	5.50256	5.82092	5.17406	5.72656
AB010352	8.86856	7.72311	8.59526	8.85528	7.62713	7.22687	7.29383	7.7475
2022-09-09	10.3943	9.28802	9.95938	10.2994	11.132	10.9921	10.6436	11.1926
Wbscr28	4.05194	3.59547	2.94507	3.53597	2.85394	2.07194	2.29692	2.78438
Fgfr2	4.40199	3.44546	4.5928	4.65227	5.33515	5.51836	5.04214	6.94863
Crem	6.462	6.64135	6.76719	6.75502	7.32912	7.74241	7.25005	8.64908
Gtf2a1	2.60953	1.93923	3.2701	3.14372	3.67638	3.58757	3.83497	4.65383
Zfp82	5.06832	4.32695	4.13529	4.48938	4.03695	2.59978	3.01437	3.65576
Zfp108	5.18304	4.87791	4.55939	5.27986	3.4427	2.26265	4.46458	4.02667
Enc1	6.76515	7.70566	6.51152	6.96108	8.60077	7.56772	7.7988	8.75964
Fgd4	5.70325	4.37293	5.87283	6.02128	4.45876	4.27789	3.73728	4.50234
Tcp11l2	8.5607	7.44606	8.22337	8.54602	9.38073	9.13115	8.83503	9.61436
BC030307	6.20337	5.31111	4.94691	5.59075	4.47442	4.79145	4.29737	4.48037
Rbbp9	6.50781	6.03613	6.46934	6.60911	5.34645	5.35923	4.65731	6.05955
Tor1aip1	7.78026	6.88815	7.56813	7.71338	8.4672	8.35968	8.09593	9.09531
Srl	4.73188	3.95759	4.35666	4.31563	3.04476	3.47175	2.86568	3.95391
Gm16223	6.97512	5.64127	6.90081	6.72161	5.56466	5.46058	5.19152	5.72162
Dysf	6.56457	6.42908	6.43396	6.77811	7.35121	7.27216	7.21892	8.3848
BC029127	7.04433	5.46789	6.69423	6.74513	5.51657	4.96581	5.1231	5.65406
Prima1	6.16964	5.36635	6.18385	6.01547	4.78425	4.60807	4.7203	5.57632
Wdr38	5.03561	5.43811	4.36425	4.85173	4.42357	2.67838	3.46545	4.01697
6430598A04Rik	4.57373	4.12901	4.53033	4.47198	5.56395	5.03565	5.03219	6.35728
Ccdc28b	4.10058	3.58246	3.95118	4.01114	3.49901	2.26667	2.29294	3.24323
Npsr1	4.19694	3.57674	3.96793	3.89691	3.31801	3.08427	1.84726	2.96668
Tle6	6.3617	5.40599	5.07656	5.59748	4.54694	4.63632	3.8512	4.95236
Ptgir	5.27764	4.22288	4.45024	4.91646	5.64943	5.28794	5.82753	6.61112
Tmem186	5.90313	5.19543	5.69622	5.70141	4.96825	3.74257	4.18691	5.12907
Nbl1	9.2611	7.76771	8.45682	8.45055	9.66961	9.38412	9.23444	10.1653
Gm2897	4.87791	4.46507	4.28018	4.92072	5.2079	5.997	5.20989	6.23893
Drd5	4.42237	3.87766	3.26521	4.10739	3.22707	2.62104	2.46248	3.2158
Ncapg	3.62706	2.64952	3.71411	3.61984	2.47076	2.34246	1.91578	2.78018
Amz1	8.62129	7.38009	7.63537	7.9161	6.68271	6.8373	6.77103	7.25278
Gm14406	8.73898	7.22107	8.49305	8.58726	7.2652	6.86564	6.9155	7.43025
Mtmr3	8.22147	7.39627	8.2445	8.59043	9.1471	9.04884	8.759	9.50671
Apbb3	8.15504	7.02134	8.17228	8.02737	9.16933	8.71764	8.45324	9.42875
Kif26a	5.49908	4.34976	3.91781	4.42204	3.45551	3.23891	2.5704	3.91375
Zfp826	6.17925	4.96433	5.43381	5.81837	4.46389	4.10222	4.03561	5.22947
Sh3bp1	6.90328	5.77501	6.7581	6.53485	5.75286	5.25865	5.05141	5.81026
Vcl	5.36106	3.82523	5.80178	6.23493	7.23193	6.418	6.34291	7.63184
Mapre3	7.65277	6.56917	7.84719	7.7758	8.48742	8.22864	8.4098	8.99974
Lyl1	7.29632	6.24256	6.43937	6.77182	5.98299	4.55991	5.41225	6.01825
Zfp820	8.73064	7.55612	8.59924	8.80888	7.36733	7.08837	7.16419	7.83498
Smpx	4.72611	5.01409	4.16719	4.5203	3.6124	3.66081	2.53825	4.0987
Spinlw1	2.96575	4.12862	3.48847	3.94069	2.06355	2.94073	2.3332	2.92912
Ube2h	8.47219	7.30694	8.47602	8.66359	9.31553	9.21791	9.04768	9.47131
Olfr30	4.30027	4.28944	4.41614	4.58852	2.93038	2.97975	4.30464	1.79652
Cand2	5.02843	3.92531	4.54415	5.14516	3.35589	2.76214	3.00403	4.41384
Ahnak	7.44234	7.20175	7.05765	7.33179	8.42721	7.81942	8.11259	9.93987
Sema4b	5.1453	4.10169	5.42682	5.30264	6.15183	5.89215	5.72127	6.48912
N28178	6.78523	5.24425	6.91715	6.14107	4.88353	4.54342	4.13954	5.85545
B3gnt9-ps	4.49432	3.94328	4.30541	4.65557	2.97972	3.01868	2.9473	4.2067
Morc4	5.01135	4.0643	4.5021	4.91387	3.87497	2.84321	3.31963	4.10848
Apobec1	6.16439	4.64372	5.24146	6.07631	6.84756	6.5967	6.2943	6.97564
Lmo2	5.84109	4.94003	5.2506	5.92286	4.83068	3.61916	3.57647	4.95994
Ldlr	3.12637	2.68805	3.04814	3.60388	4.08822	3.80513	3.78899	4.98397
Taf3	5.42444	4.66903	5.69822	5.87407	6.35132	6.25861	6.17627	7.17856
Per1	8.68162	8.49916	9.57942	7.30225	9.80985	9.97166	9.34664	10.6566
4833422M21Rik	6.09937	5.3462	5.27484	4.75218	4.7148	4.33761	3.66457	4.44006
Pard6b	4.74908	4.44507	4.94812	5.13533	5.2269	6.18762	5.52028	6.6767
Gm9806	5.95298	5.62695	5.55398	5.68185	5.28216	5.11195	4.40578	4.00266
2310058D17Rik	5.08272	3.86616	5.17161	5.36491	3.47478	3.80672	3.40016	4.24669
Grasp	5.51232	4.90168	5.73995	5.095	6.45558	5.72725	6.17797	7.00238
Tceal1	6.61674	5.95987	6.62169	7.1003	5.47489	5.30174	5.24272	6.2056
Loxl1	7.70011	6.76955	7.33246	7.89431	8.89968	7.87802	8.25404	9.2375
3021401N23Rik	5.51101	4.84882	4.60848	5.37447	4.48252	2.90073	3.77423	4.40045
C230096K16Rik	6.13295	4.32625	5.6558	6.11318	6.81962	7.0072	6.45454	6.85368
BC027231	3.8234	3.2707	3.80752	4.04641	4.15071	4.64448	5.00487	6.12594
Slc14a2	8.41112	8.36794	8.09302	8.12442	6.85219	6.98941	6.54079	8.20398
Klhl30	4.58108	4.02559	3.97534	4.25727	3.18982	2.58579	2.90585	4.01398
Coro2a	5.4171	2.83309	5.47484	4.67753	6.35227	6.28841	5.63814	6.74282
Ripk3	5.25997	4.14801	4.17174	4.48153	5.54344	5.34817	5.21509	6.60119
Gm14440	9.84999	8.36096	9.34717	9.71166	8.4668	8.01881	7.98911	8.48084
Slc11a1	5.61757	5.30272	5.29725	5.44377	6.45809	5.83229	6.20527	7.50355
Odz4	5.42608	5.2489	4.66965	4.85107	3.62988	4.27041	3.54438	4.6983
Ripk4	8.16363	6.96472	8.51116	7.92142	8.83461	9.11664	8.568	9.6062
Gm7008	5.52855	4.54042	4.50069	4.94455	3.60889	4.34145	3.2059	4.13317
Gm19315	9.00466	7.73734	8.75137	9.06416	7.81664	7.35855	7.40739	7.86134
Crispld2	6.76884	6.31521	6.83592	7.05604	7.86975	7.23795	7.55656	9.03792
Clic3	7.96355	6.69515	7.73297	8.07633	6.08793	6.69333	6.55711	6.87084
Wdr54	3.7242	3.37505	3.97497	4.37399	2.17267	2.98314	1.9944	3.57141
Prss30	3.43343	3.88851	4.03443	4.96249	3.27216	2.79239	2.28516	3.36887
Stard8	10.1595	9.28671	9.79412	10.1477	8.93148	8.46477	8.34783	9.52752
Aldh18a1	4.1897	3.50158	4.19876	4.80417	5.70464	4.6895	4.95859	6.39734
Uap1	10.3737	9.24631	10.4909	10.3212	11.0646	11.376	10.7107	11.3268
Zfp566	5.7713	5.93323	5.31256	5.47488	4.80693	3.96672	4.31958	5.3542
Hip1	5.14019	3.82185	4.54992	4.68811	3.39458	2.95321	2.96143	4.27893
Arf2	6.20655	4.98362	6.08212	6.28046	6.92305	6.64883	6.7584	8.06099
Id4	8.91141	7.76385	8.53963	9.03648	7.60831	7.53493	7.15784	7.94877
Serinc2	9.26495	8.02874	8.83024	8.91489	9.86202	9.6426	9.28284	10.271
Klk7	4.90296	4.18085	4.02311	4.56612	3.87629	3.33359	2.59196	3.74542
B230208H11Rik	6.13025	4.48187	3.84374	4.47706	6.25287	6.02063	5.64602	6.29579
Npy	6.08277	3.45771	4.83412	4.47831	6.49743	5.50056	6.10322	7.97831
Chrna4	5.49584	5.03165	6.0479	6.19031	4.74866	4.16874	4.19628	5.32573
Fcgr1	5.44472	5.35843	4.763	5.53336	8.00487	7.50936	5.47156	6.1646
Rab31	6.85136	5.93934	6.69107	6.8892	7.78046	7.17386	7.28508	8.78043
Marcksl1	7.91712	6.65142	7.71743	8.10305	8.77334	8.70327	8.11838	9.1809
Pax8	7.55877	6.23005	8.04141	8.1714	8.77132	8.715	8.27429	9.47295
Myo1f	4.4709	4.47501	4.39285	4.74774	3.69732	2.80245	3.04606	4.37272
Abhd13	6.00382	4.71769	6.07593	6.17936	6.83859	6.63424	6.51306	7.83118
Stx3	7.12324	6.31573	7.12408	7.53295	7.94388	7.68795	7.85077	9.02637
Inpp4a	4.59718	4.3654	4.23278	4.48854	3.31274	3.84886	2.43257	3.95511
Trex1	7.21011	6.33191	6.60725	6.99596	8.20284	8.10487	6.89996	8.15878
E130306D19Rik	6.12274	4.95757	5.12343	5.86036	4.22331	4.6797	3.96626	5.01245
Tmem86a	10.924	8.4469	9.71649	10.1967	8.28237	8.90311	8.02919	8.53279
Gm3893	6.92608	5.07977	6.03238	5.8025	7.55246	7.01583	6.56648	7.38905
Pola2	5.32644	3.37867	5.09742	5.15046	6.23165	5.85716	5.46165	6.88495
Bnc2	5.39082	4.07363	5.52414	5.93115	3.79864	4.23431	3.47726	4.54116
Polk	6.31332	5.70618	5.8187	6.10955	5.17254	4.43533	4.24172	5.80719
Fam110a	6.38958	8.0081	5.99412	7.09924	5.28826	5.62693	5.04792	6.28553
4930544O15Rik	4.39206	3.14029	3.75201	4.61949	2.89628	3.15203	2.54992	3.16587
Slc15a2	9.0657	8.8289	8.5494	9.36874	8.48985	8.42309	7.06665	7.53293
Nnmt	5.50099	6.77425	4.77705	4.98666	7.79937	6.50067	6.1508	7.31703
Wsb1	8.08656	7.00537	7.87112	8.72602	8.97667	8.89518	8.67088	9.44599
Plekhn1	5.02904	6.2236	4.57241	4.56177	4.39432	3.81691	3.76488	3.93569
Rrp12	3.64951	4.41617	3.9201	4.1597	4.97029	4.62513	4.81056	6.46172
Smtn	8.80632	8.11631	8.87821	8.78744	9.34362	9.28494	9.46242	10.6688
Lrrc23	6.99829	6.16875	5.43607	6.07028	5.15117	5.16284	4.65413	5.55856
Scara5	4.2133	4.45337	4.27084	4.36794	3.58149	2.35808	2.42869	4.2113
2022-03-07	7.50567	6.27101	7.26419	7.60317	8.1652	8.2353	7.69782	8.56764
Apoh	7.56944	7.64353	6.18472	6.71898	8.25537	8.10134	7.74514	8.10902
Mmp24	2.70117	3.84754	4.17223	4.33101	2.61649	2.76715	2.35404	3.03892
Ces1g	7.15168	7.18716	8.65068	9.23844	9.75744	9.08324	9.2234	9.5325
Zbtb3	4.7344	4.4593	4.61056	4.97924	3.94879	2.76723	3.28516	4.52189
Galntl2	6.44403	5.8879	5.61559	6.08181	7.86354	7.27426	6.22409	6.84713
Gm3696	5.03125	3.84191	4.25506	5.00947	5.40298	5.54468	5.09364	6.44717
Btc	5.72797	4.38703	5.37407	5.17896	6.37853	5.79032	5.79741	6.79422
Gm9615	4.56556	2.12335	4.15675	3.73958	5.79537	4.72897	4.37632	5.64974
Mll2	2.48474	1.78632	3.60513	3.52308	4.00987	3.57726	3.99402	5.25176
Ssfa2	9.54036	7.82625	9.46766	9.67031	10.4566	10.1556	9.9936	10.4968
Kctd10	6.51571	6.59477	6.89387	7.16089	7.84794	7.26386	7.37271	8.83608
Cdkn2aip	5.81795	4.28212	5.58601	5.91287	6.54261	6.45613	6.14901	6.64376
Sertad4	5.27746	3.78719	4.82068	4.63272	5.56218	5.30954	5.46147	6.53696
A630089N07Rik	7.80025	6.38169	7.58705	7.87069	6.4988	6.1633	6.17107	6.742
C1qtnf2	5.32191	4.61964	5.09423	5.80245	3.64684	3.46129	4.05605	5.1357
Tmem194b	4.69	4.18421	4.28901	5.04318	3.67993	2.85428	3.05381	4.4041
Pbk	4.72777	2.8464	4.3653	3.96994	2.62585	2.52889	2.43234	3.55298
Ccl5	6.03706	4.17983	6.25687	5.65148	8.58979	8.96991	5.9552	6.44347
Ttc30a1	6.1872	5.14619	5.56237	6.56938	5.10327	3.79581	4.07975	5.49919
4931408D14Rik	9.15624	7.54526	7.92364	7.59969	8.89931	9.40931	8.83233	9.27277
Pim3	10.6841	10.5181	11.6382	10.6862	11.4133	12.107	11.4602	12.6284
Ubxn11	4.67965	3.85029	4.43497	5.03006	3.74548	3.52672	2.60306	4.01498
Cdk6	3.78969	1.46075	4.45323	4.53375	5.68682	4.93989	4.96013	5.23536
Olfr76	3.10594	4.64366	4.67909	5.2509	3.09182	3.57021	2.78959	3.46249
Arl6ip5	9.54593	9.94888	9.20171	9.62521	10.2673	10.2968	10.1581	11.7262
Cd40	3.98863	3.21825	3.96898	4.36938	4.97208	5.33533	3.98852	5.33522
Cyp2c29	6.68335	5.30778	5.99885	6.71182	5.03192	4.95734	4.77178	5.81697
Nlrc5	4.72921	4.07748	4.32573	4.78196	4.11201	3.38398	2.45696	3.86043
Atm	5.21619	3.76456	4.55487	5.07396	3.91226	3.4557	2.97422	4.09441
Cyp27b1	7.02621	4.27824	6.00568	5.01484	4.02696	4.14389	3.92967	4.64067
Tpm3	6.85627	5.60748	7.00852	7.22191	7.58714	7.45907	7.49806	8.3066
Lrp8	3.5786	1.92404	3.52577	2.53753	4.12334	3.53099	3.75193	4.85785
Cyth3	7.25493	6.06376	7.13947	7.4545	8.20258	7.47848	7.68927	9.09843
Cyp24a1	8.89571	9.01182	10.747	11.2485	11.6555	10.5451	11.597	12.159
D1Pas1	5.87107	5.05473	6.15955	6.37556	7.00293	6.49996	6.38639	7.68897
Pdlim1	7.24943	6.74715	6.67588	6.90483	8.20228	7.02764	7.60343	8.93313
1700018B24Rik	5.94383	7.347	5.71254	5.97879	5.46893	4.98625	4.8004	5.61541
Shank3	8.52943	7.07239	8.46473	8.69478	9.36386	8.83713	8.92728	10.0158
Gas1	9.29126	7.68006	8.85903	9.24288	8.28791	7.53154	7.49631	7.66178
2200002K05Rik	6.70153	6.12268	6.28752	6.84421	5.42006	5.26611	4.74416	6.50605
P2ry2	4.40305	3.78427	4.01461	3.80521	4.70897	4.58908	4.64278	6.374
4930567H12Rik	5.68478	7.05262	5.25981	5.59049	5.26766	4.68515	4.91884	4.67643
Grk5	5.8371	5.66772	5.70311	6.15372	6.9953	5.98091	6.52624	7.90735
Agap2	3.67141	2.25478	2.75609	1.70654	4.10472	3.40556	3.95163	3.23569
Hoxa11	6.64472	4.99908	5.92134	6.06038	5.66174	4.22495	4.38416	5.01355
Olfr1342	6.35683	5.48475	4.58349	5.61986	4.5148	4.58438	3.8654	5.00452
Tmem40	3.23534	3.73126	2.35934	2.5989	4.63467	3.77992	3.13427	5.01289
Clec2h	10.6479	8.54204	10.2656	10.3507	8.49968	8.70755	8.6484	9.38897
Lpcat1	5.10623	4.49054	5.3144	5.96496	4.46568	3.56482	3.39259	5.05087
Tcte2	4.51035	2.81589	3.98935	4.01699	2.38531	3.35983	1.98012	3.24434
Usp43	5.10172	3.38642	5.38373	5.24753	5.99001	5.53966	5.56656	6.68443
Synj1	2.61455	2.25621	4.76706	2.76005	4.00993	4.73886	4.04251	4.64208
Snord33	4.87282	3.80799	3.74399	3.49689	4.94006	4.4663	4.64779	6.0015
Kcnf1	4.32759	2.76219	4.48607	4.2196	2.52947	1.73257	2.88725	3.7646
Chn1	4.78303	3.66389	4.90596	5.12281	6.09585	4.88893	5.3323	6.2238
Jup	7.58848	6.4418	8.01314	7.93514	8.60698	8.19897	7.97612	9.27809
Utf1	3.45412	5.70157	4.9781	5.73796	3.80635	3.8094	3.98325	3.72223
Adamts4	5.51081	7.54492	5.30854	5.78025	7.41269	6.82616	6.7796	7.9565
6030419C18Rik	4.04228	1.91634	2.90864	3.09756	4.34536	3.48621	3.83381	4.63997
Slamf8	4.21839	4.14515	3.91026	4.66742	4.14419	2.56478	2.38897	3.77635
Mrap	3.16293	7.261	3.12111	2.86815	9.74876	5.49739	4.8849	7.6604
Ppp2ca	3.11152	3.52117	3.2286	3.50189	3.33955	4.71776	4.13111	6.27596
Socs7	5.3819	3.2803	4.75106	4.91216	5.60527	5.61939	5.15053	6.22997
Nphs2	7.2007	6.49602	7.51832	8.42044	6.47861	5.67795	6.02296	7.1561
Ifit2	5.69583	4.47599	5.04535	5.55842	7.75078	7.34937	4.89035	6.26516
Hspa1b	4.16123	5.0075	4.5613	4.13577	5.49743	5.1952	4.75631	7.45667
D630004D15Rik	3.9245	3.69734	3.26531	3.35816	4.99178	4.49275	3.32853	5.99281
Aprt	3.97539	1.9968	3.94608	4.02354	4.32698	4.33786	4.32245	5.59773
Lrg1	7.45935	8.98445	6.94701	7.03814	9.98689	8.5332	7.85907	9.09039
Kcnk3	4.75851	5.339	4.718	4.88577	4.87589	3.59028	2.52765	4.44356
Macc1	5.30355	4.7075	4.20329	4.37312	5.75872	5.22397	4.81488	6.95562
Slc20a2	7.23162	5.92651	7.48124	7.78762	8.32596	7.52229	7.66624	8.95966
D4Ertd681e	5.29931	3.21185	4.73428	5.20164	4.65754	2.72797	3.23994	3.15294
Sirpa	5.13316	3.93462	6.09267	6.21003	4.27673	3.84059	3.86764	5.0377
Eps8l1	5.56399	4.13389	3.64805	5.45363	5.49426	5.6116	5.19112	6.6569
Ntf3	4.84985	3.14788	3.65001	4.27498	3.8742	2.33054	2.00874	3.54359
Ifi44	6.63591	6.48537	6.552	7.17641	6.80243	6.44377	4.12974	5.01128
Fzd3	3.7033	2.66055	2.02609	4.70403	2.11454	2.6045	1.92762	2.20323
Tatdn2	6.98445	7.50811	7.17734	8.18477	8.69852	7.7471	7.61633	10.1296
Pcdh7	5.99585	3.76148	5.26164	5.27898	4.09409	3.41576	3.59989	5.08792
6030422H21Rik	8.09869	8.86393	9.01108	5.51173	9.77733	9.34365	8.73314	9.02064
Ifit3	9.64	8.19299	8.78333	9.23847	11.333	10.716	8.57185	9.54273
Mx2	5.6328	4.84831	4.99004	5.63409	8.95285	8.83599	4.51635	5.54433
